# Supplementary material
Source: Research Square preprint supplement (doi:10.21203/rs.3.rs-9215979/v1)

# Aged Cumulus Cells

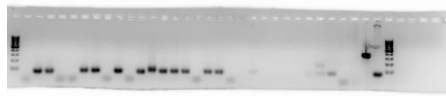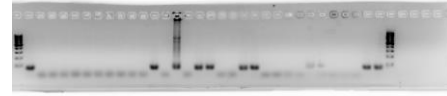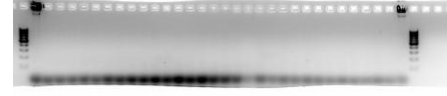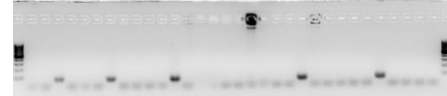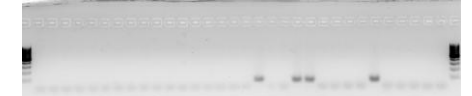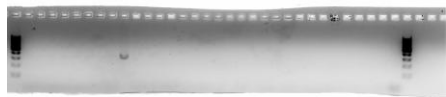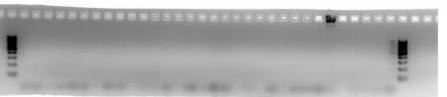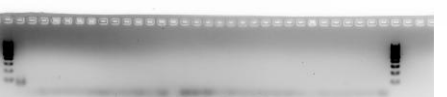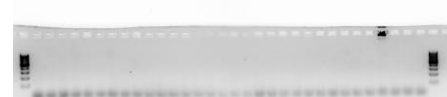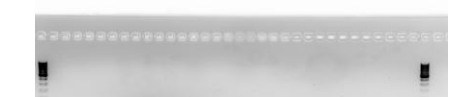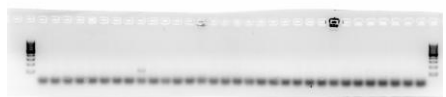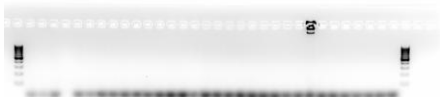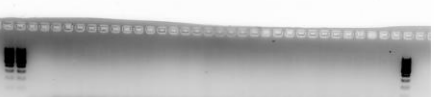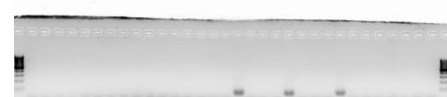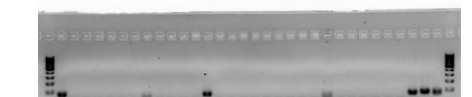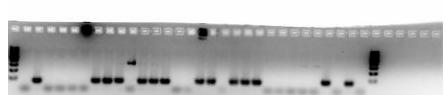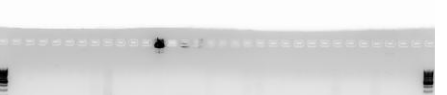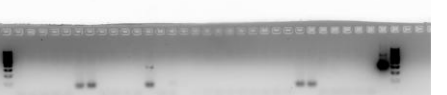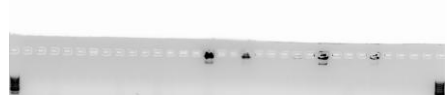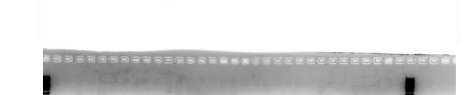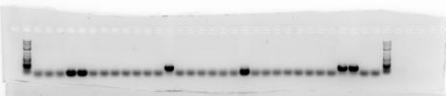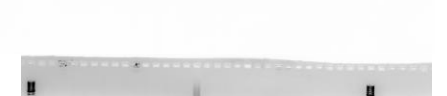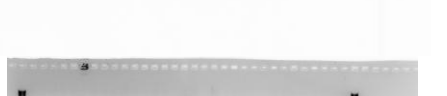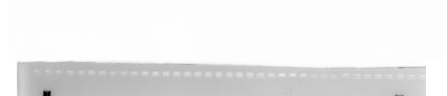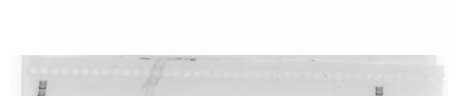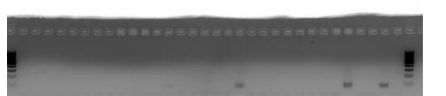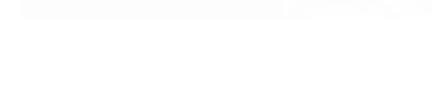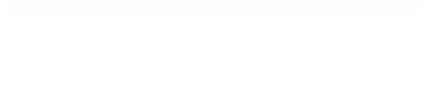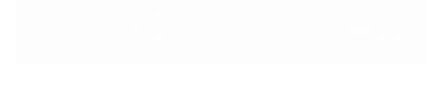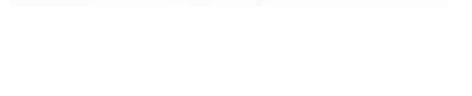

# Aged Cumulus Cells

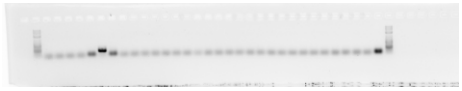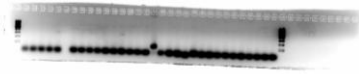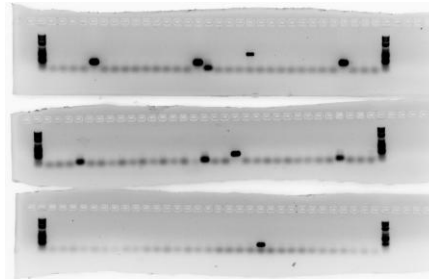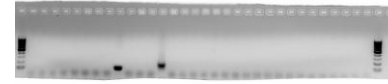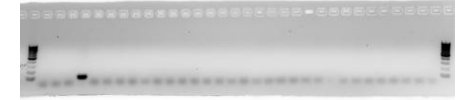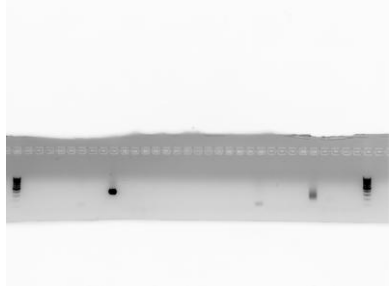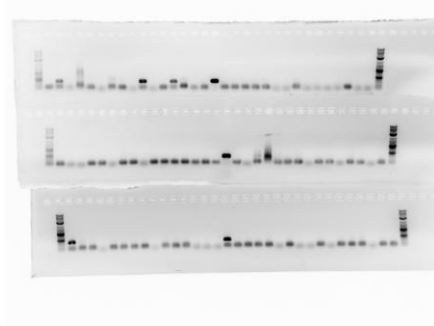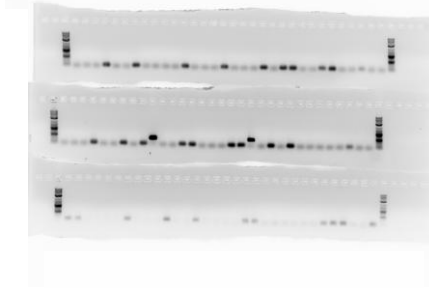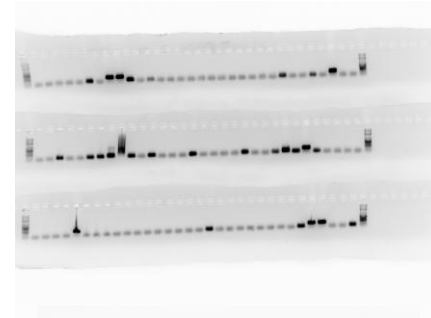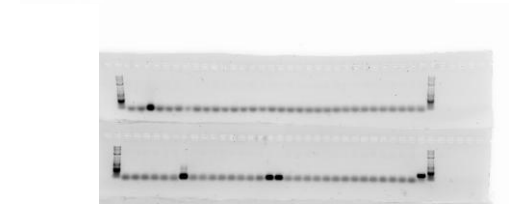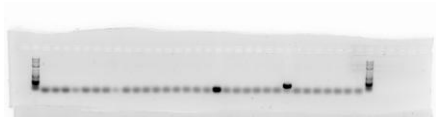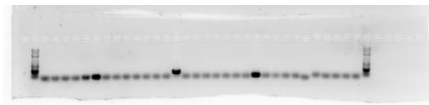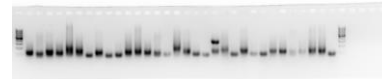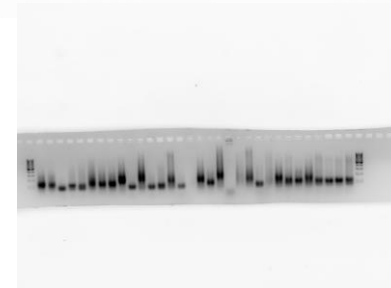



## Small Aged Cumulus Cells

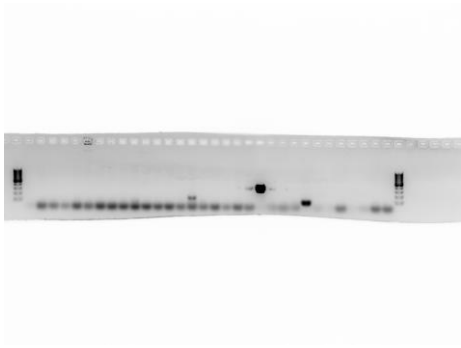



## Large Aged Cumulus Cells

# Low $\Delta\Psi_m$ Aged Cumulus Cells

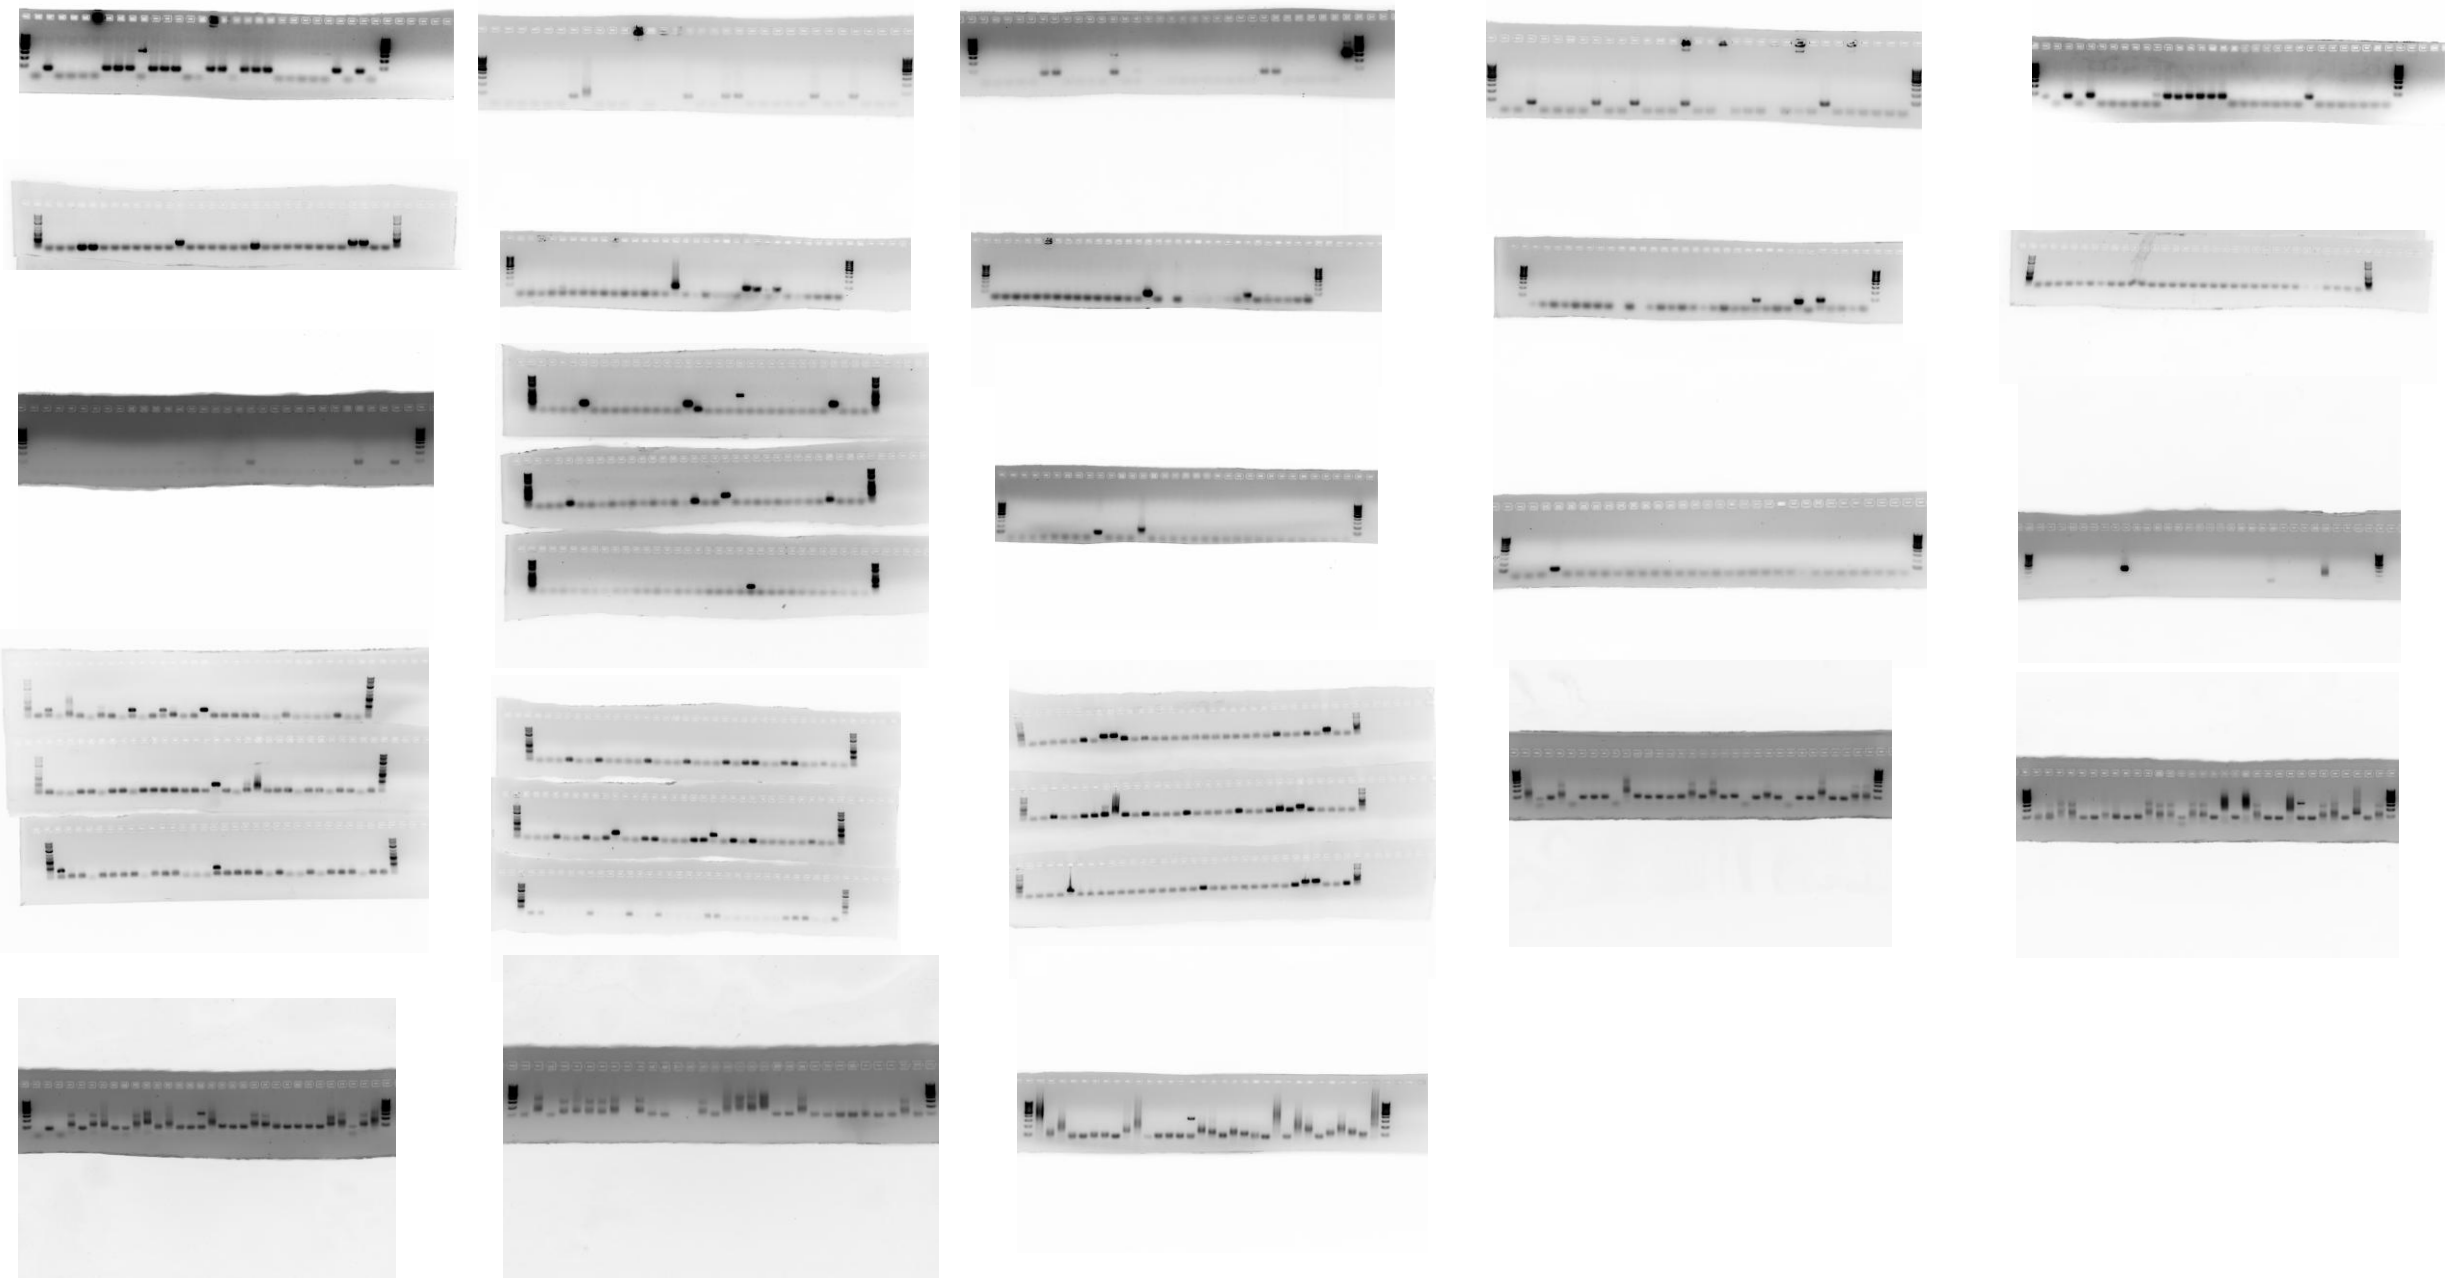

# High $\Delta\Psi_m$ Aged Cumulus Cells

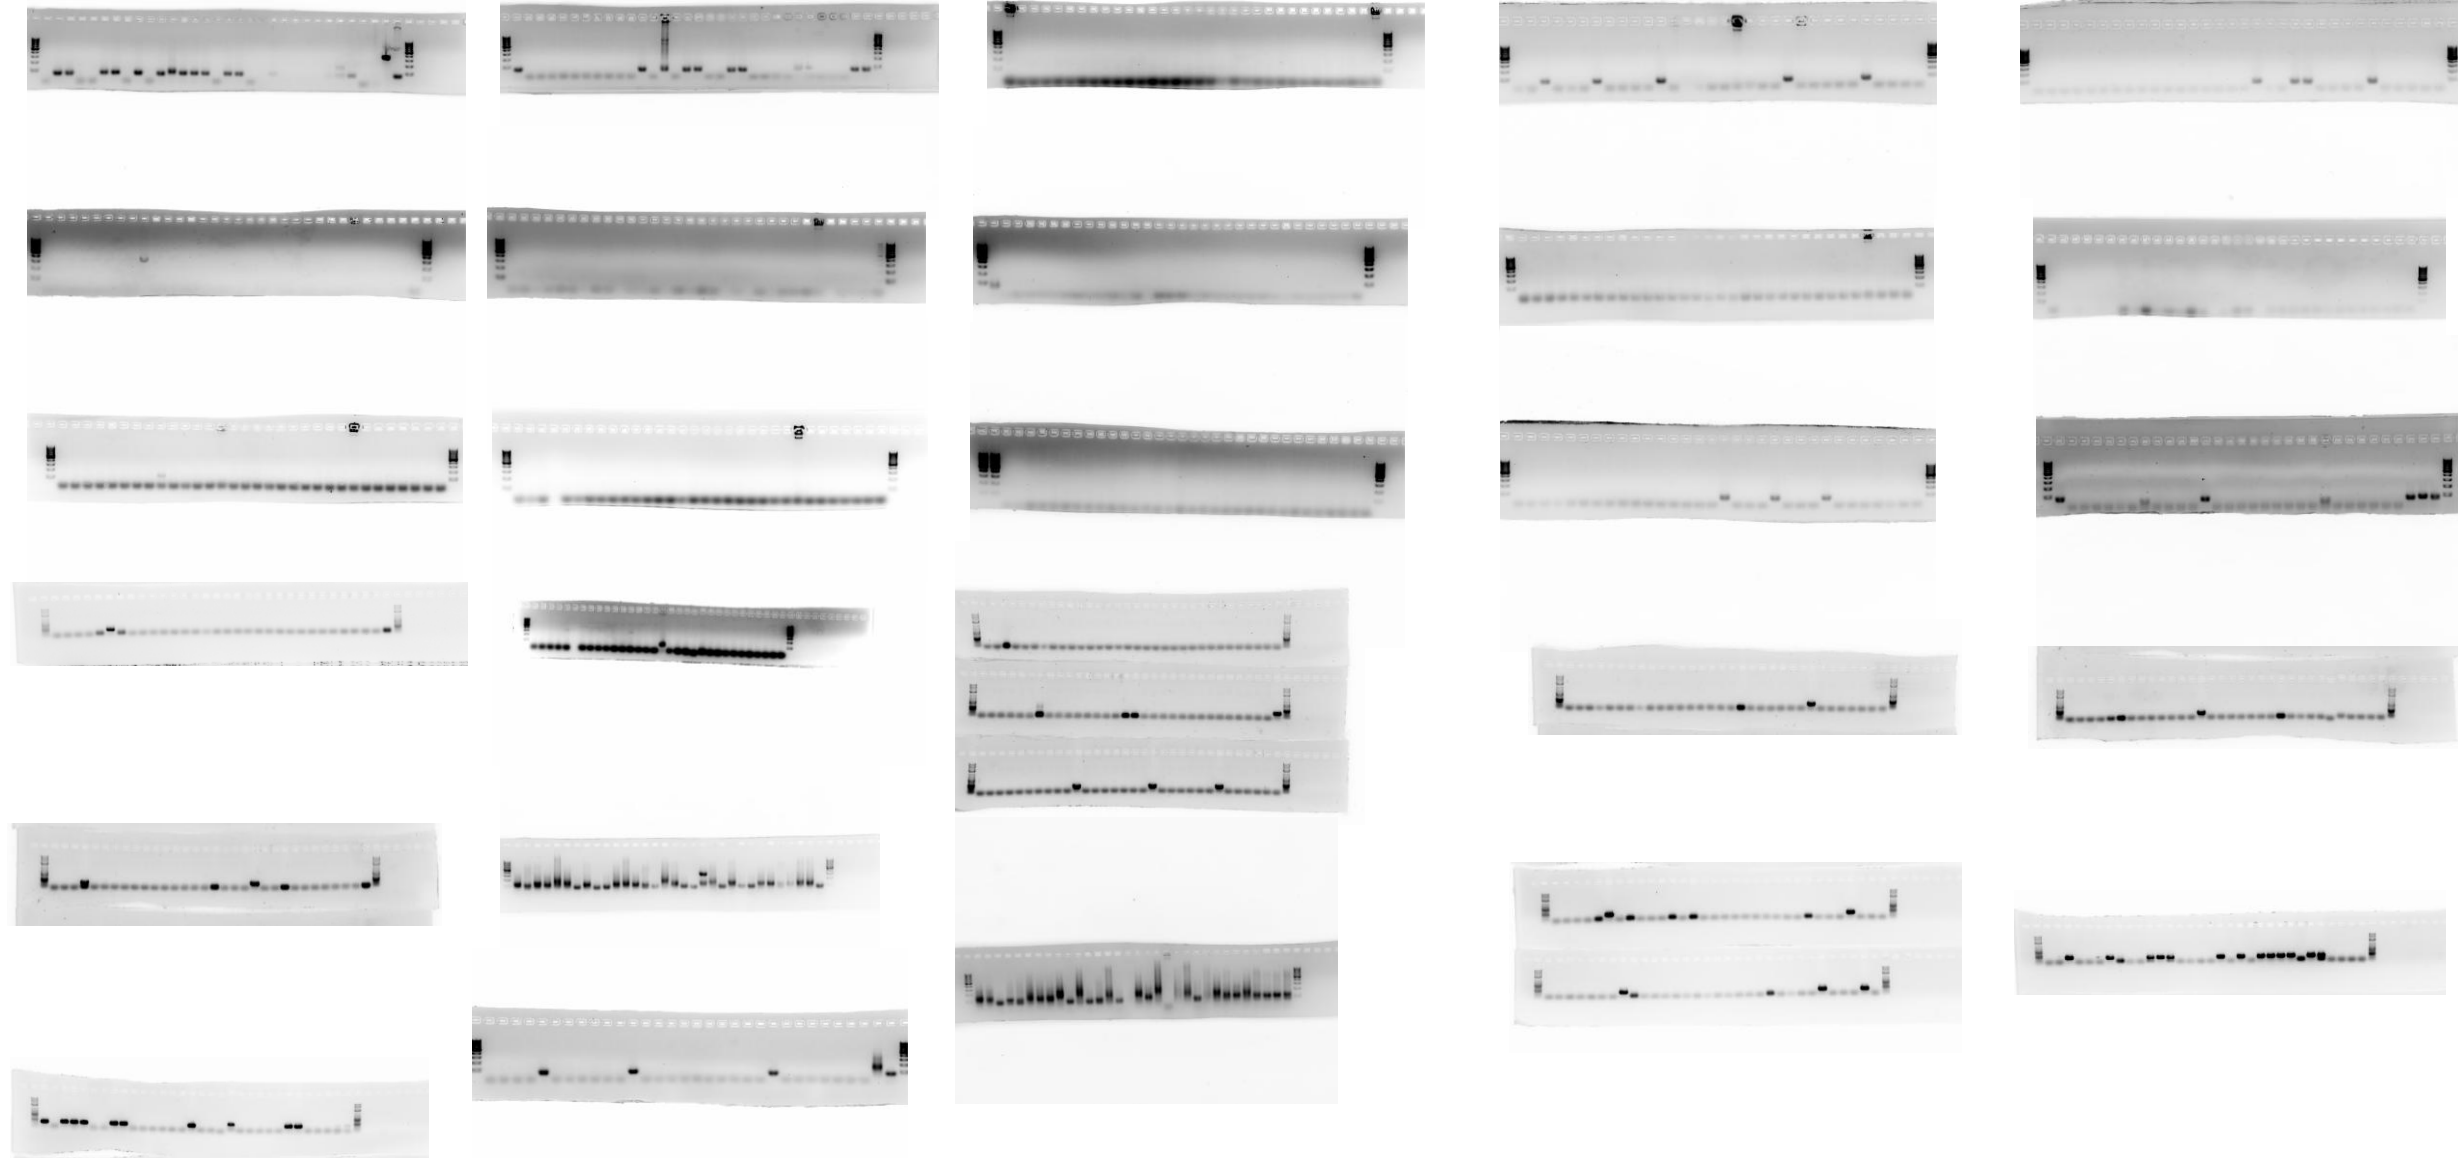

# High $\Delta\Psi_m$ Aged Cumulus Cells

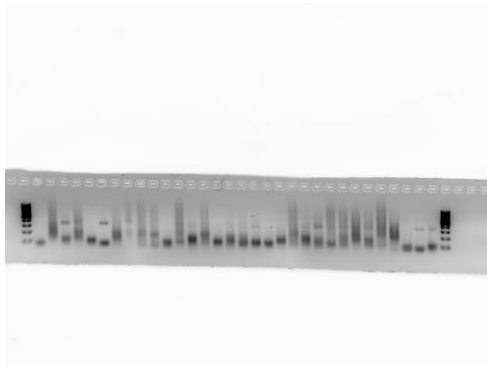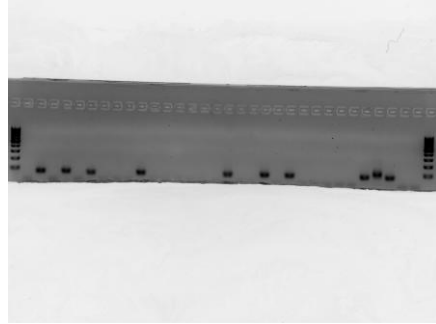

Supplement: Supplementary file 2 [file 589b1c7340d12b46782d8887.pdf]
