# Supplementary material
Source: Research Square preprint supplement (doi:10.21203/rs.3.rs-9215979/v1)

# Young Oocytes

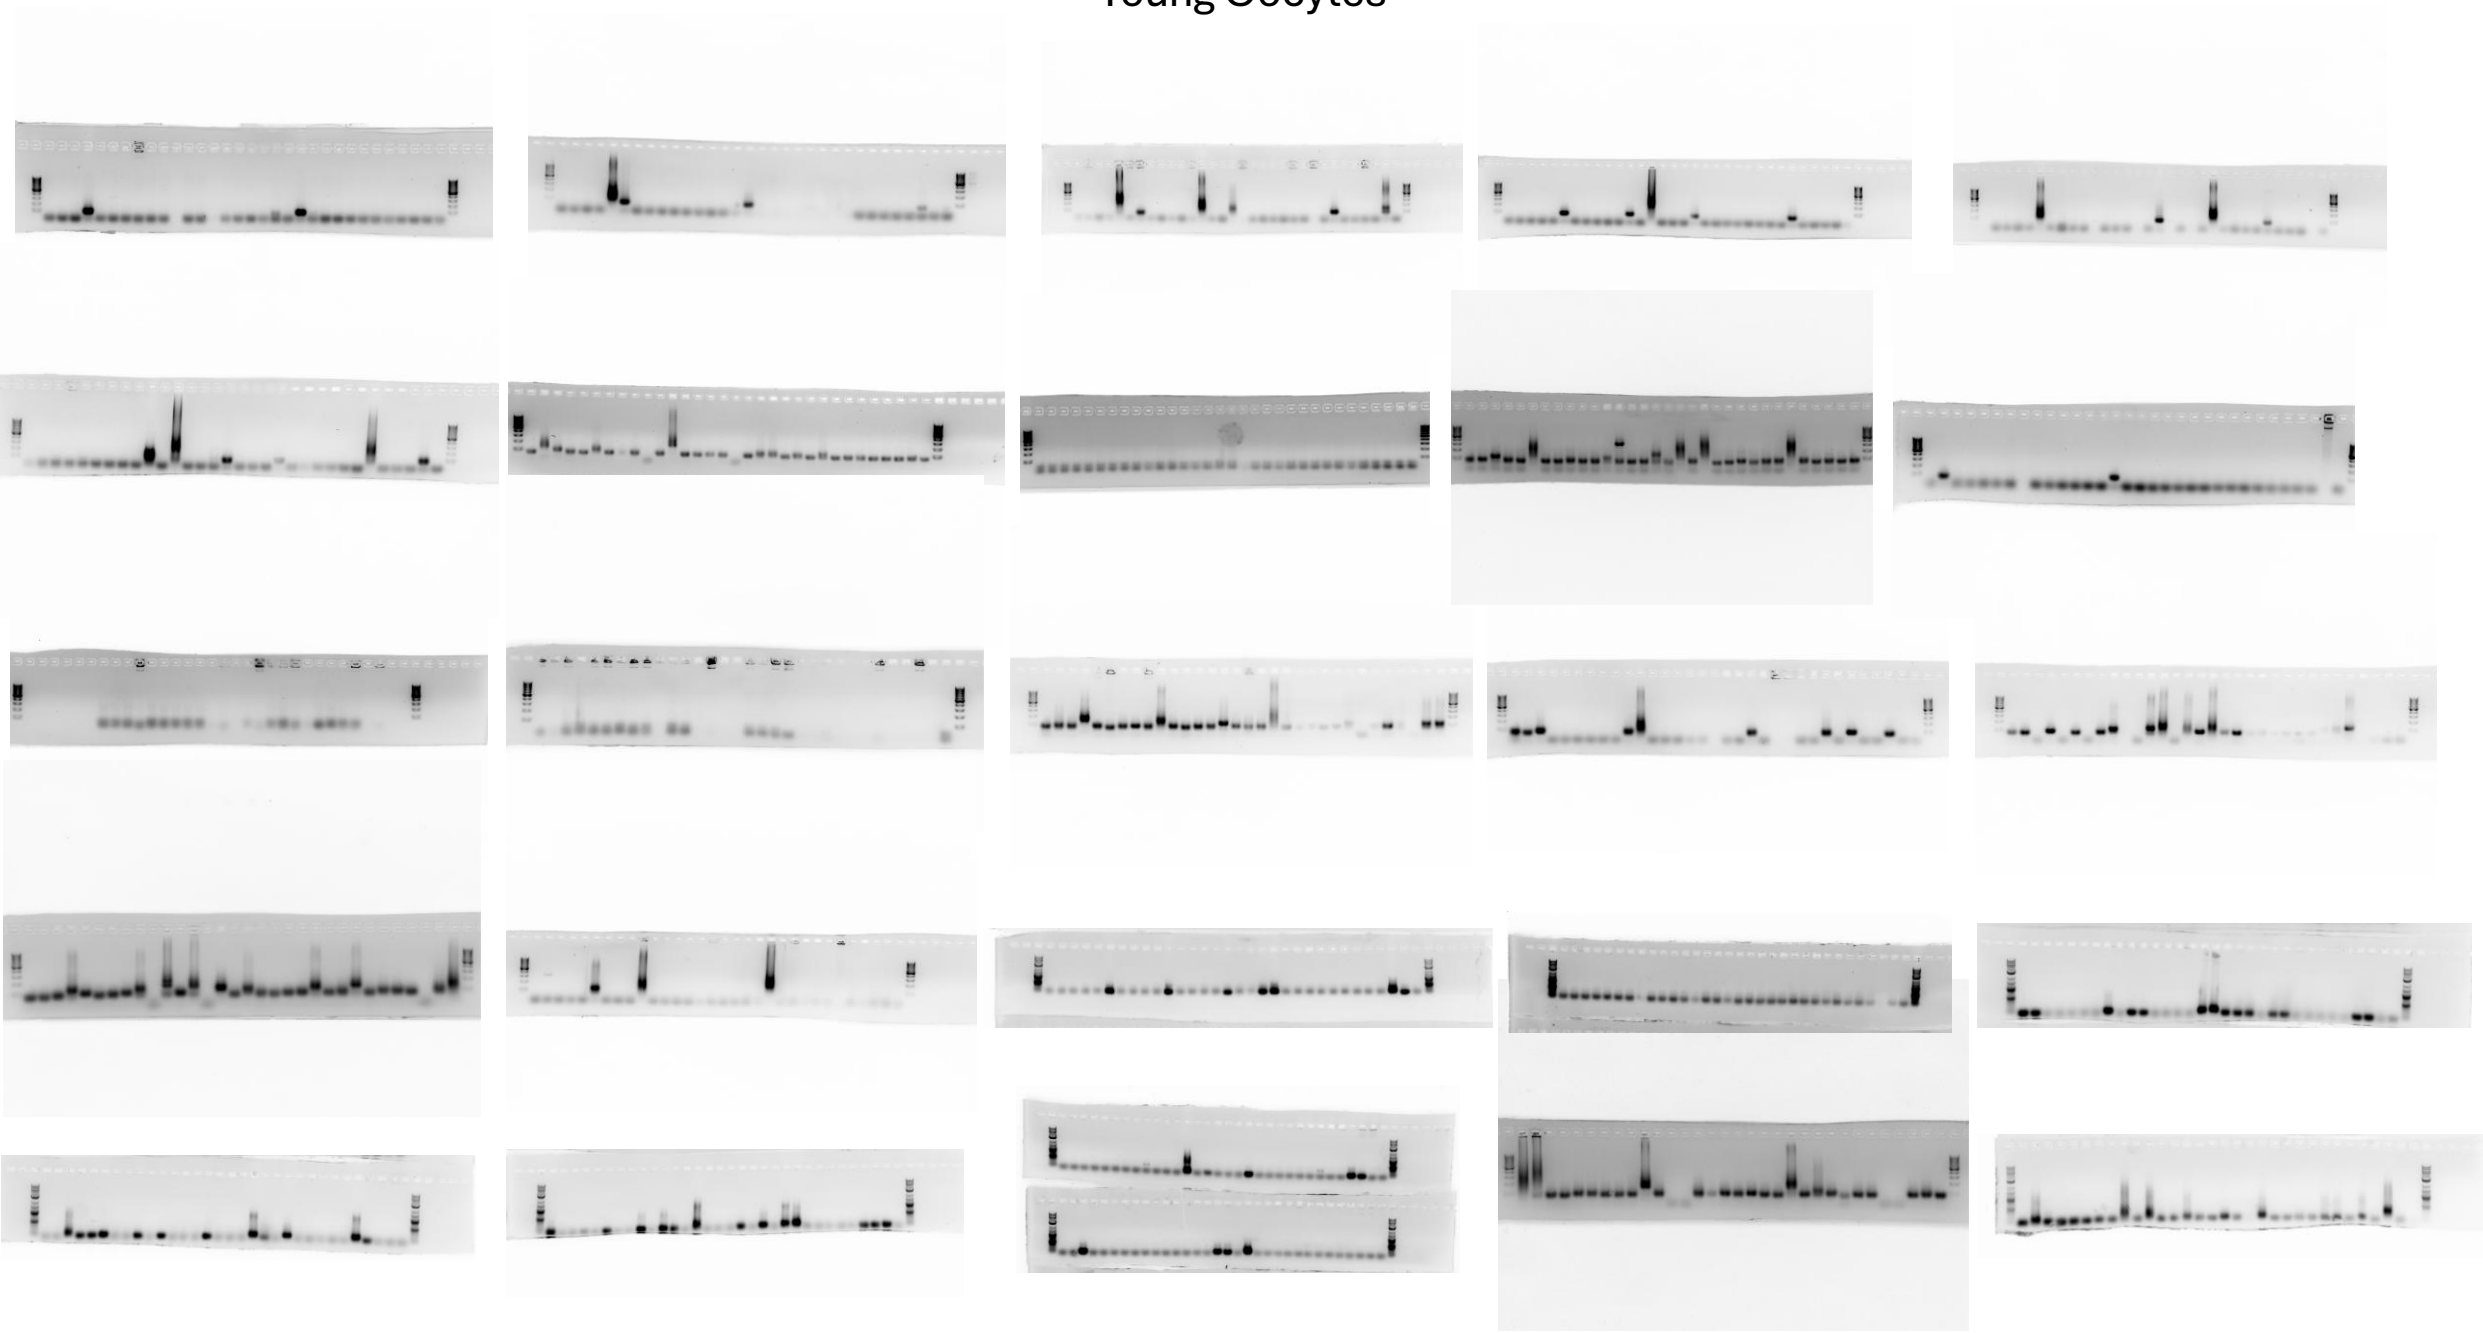



# Young Oocytes

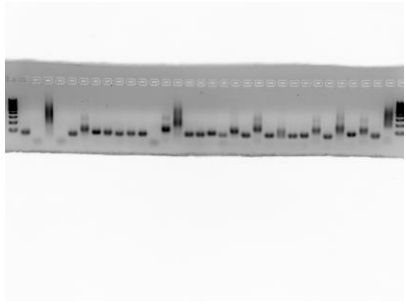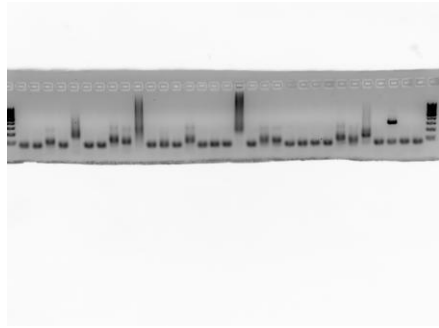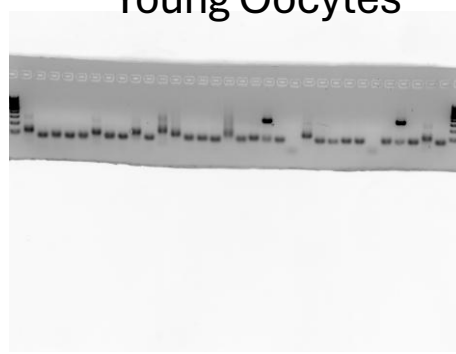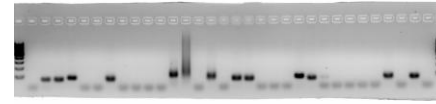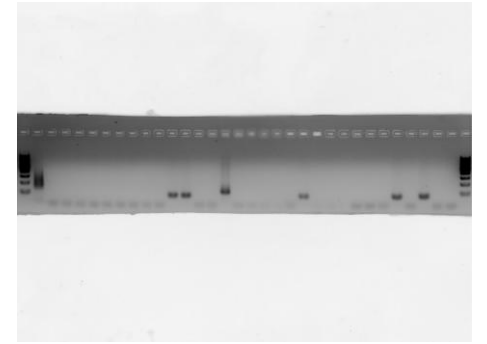

# Small Young Oocytes

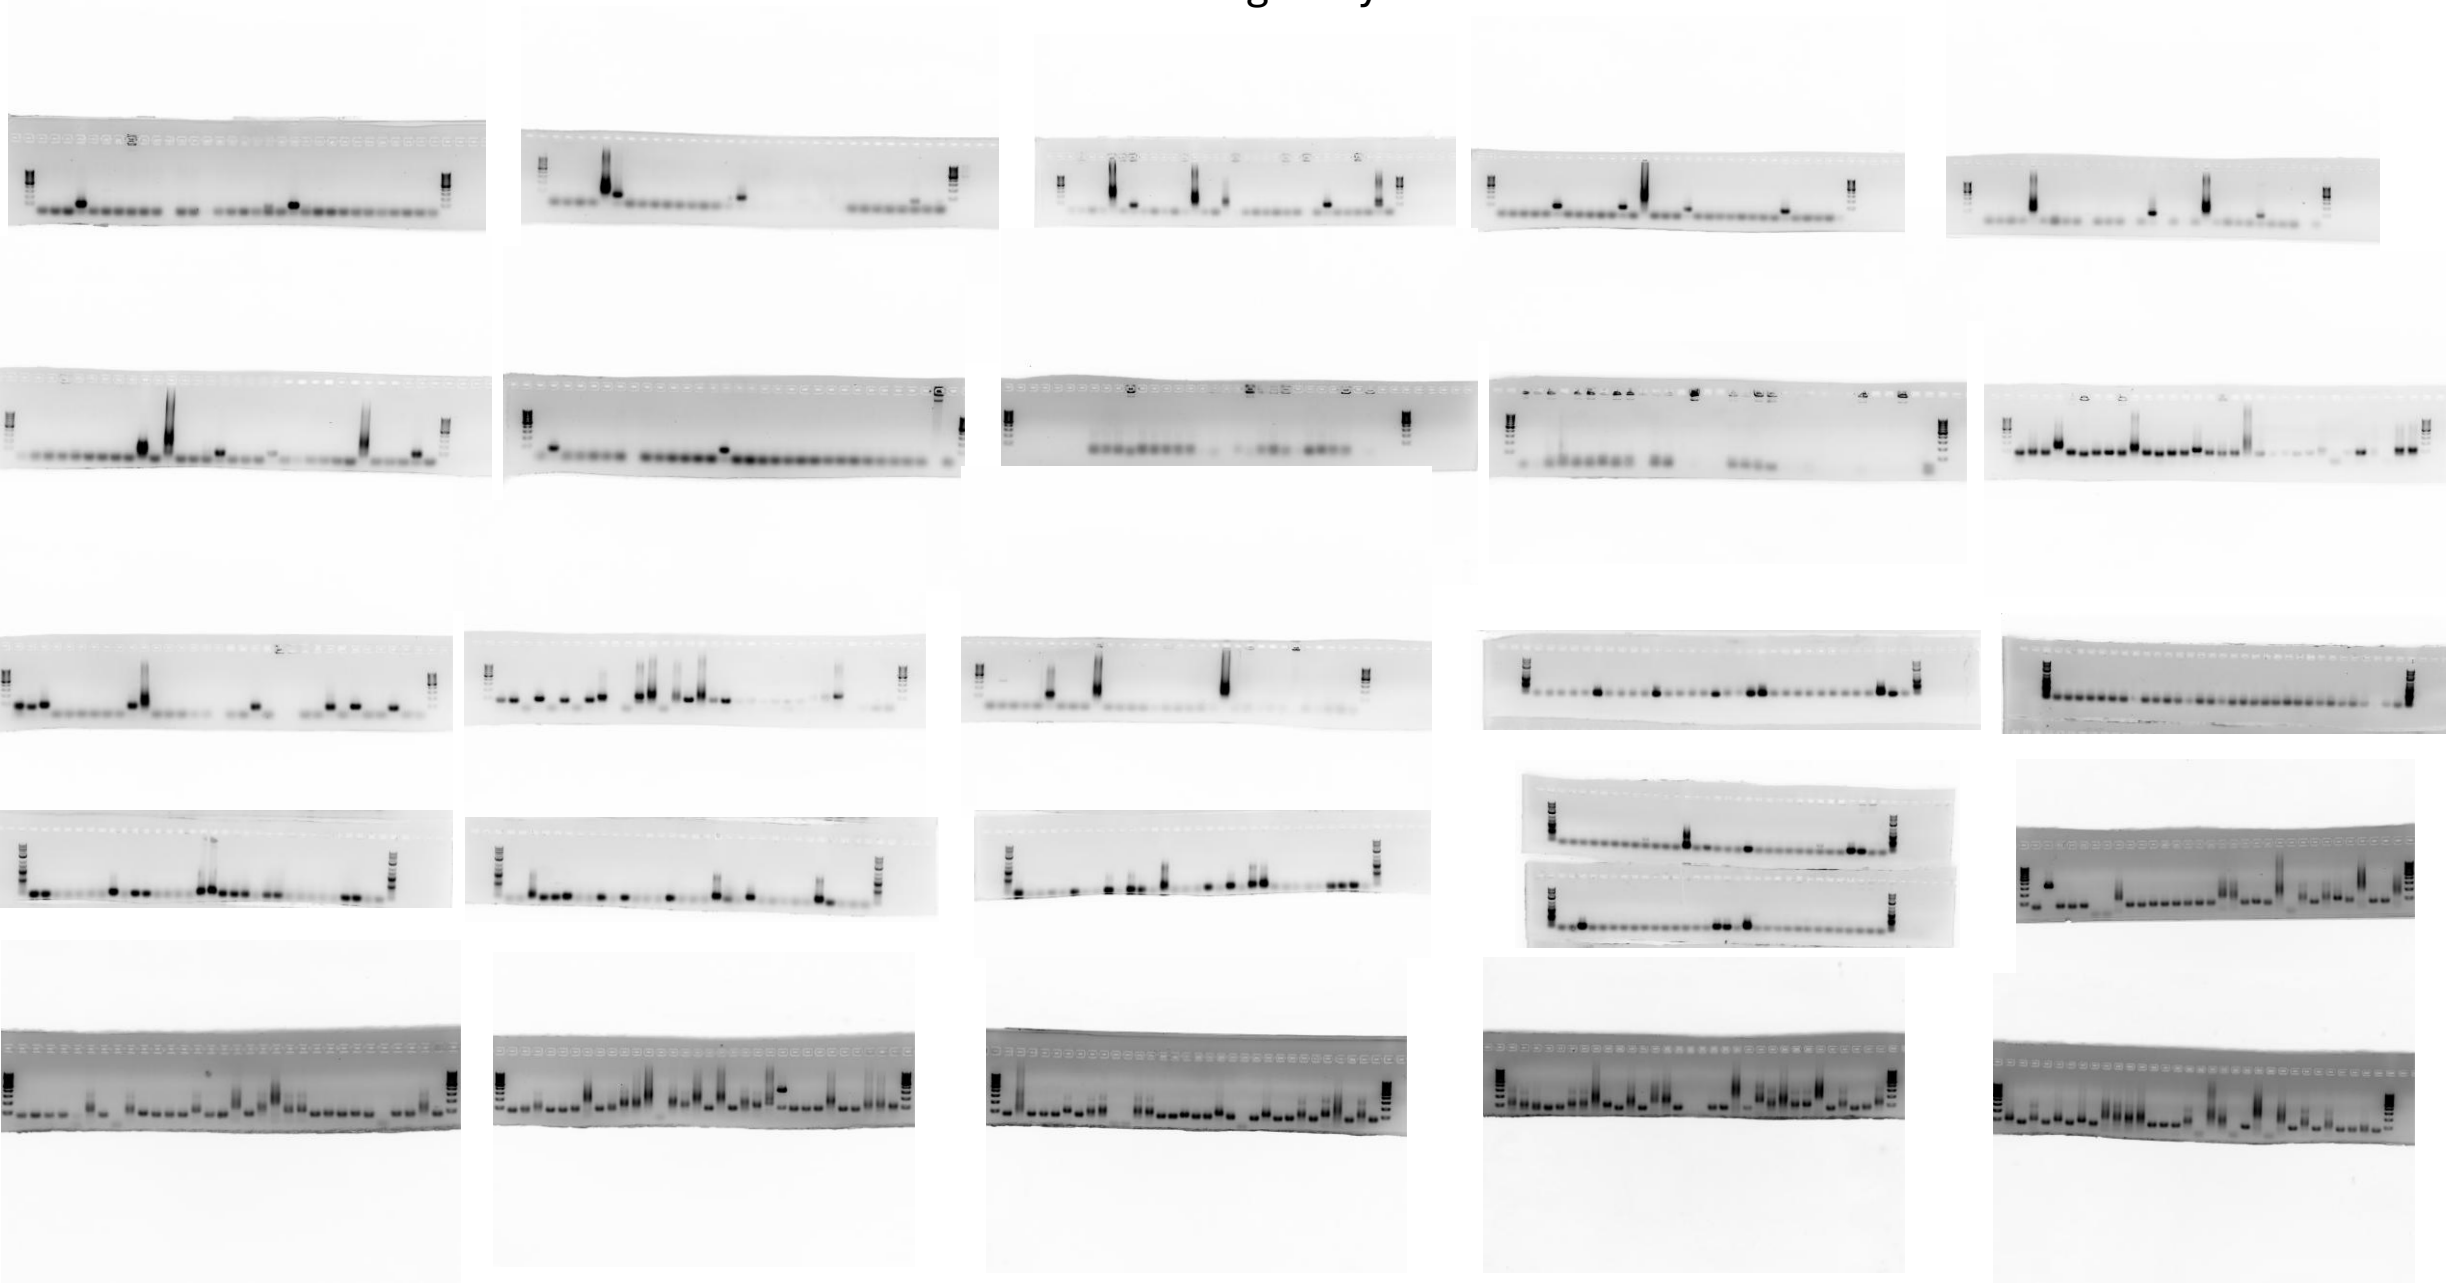

# Small Young Oocytes

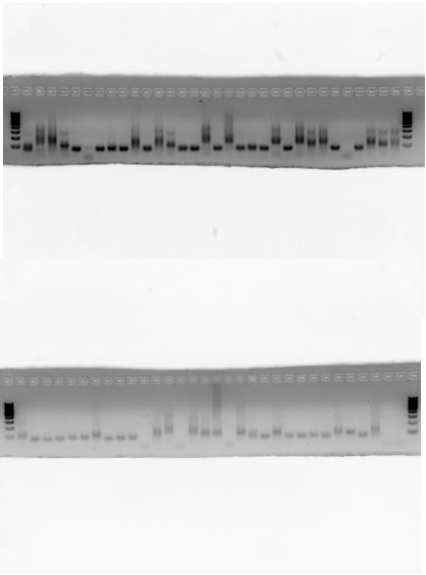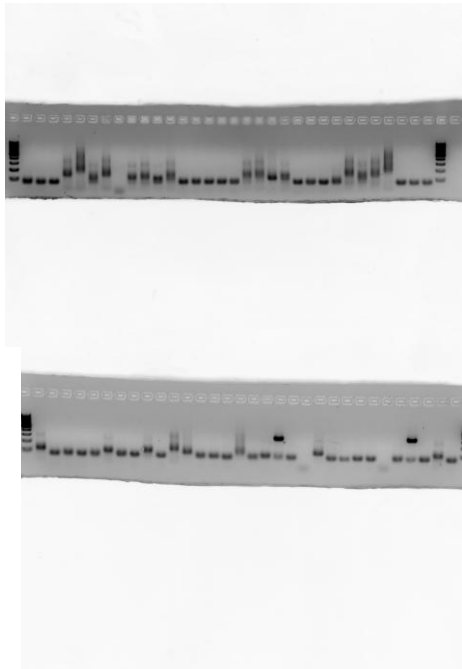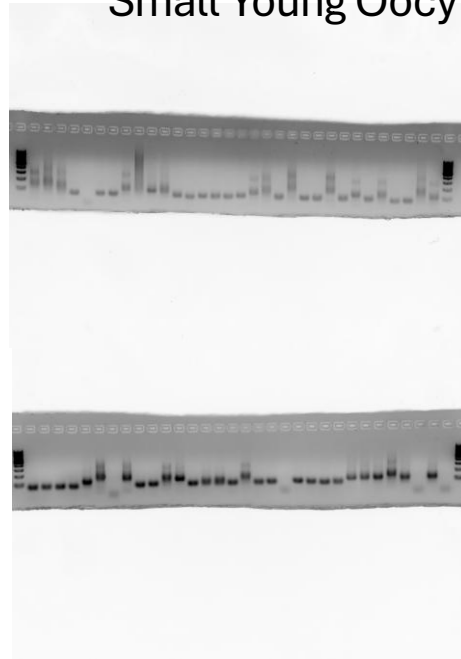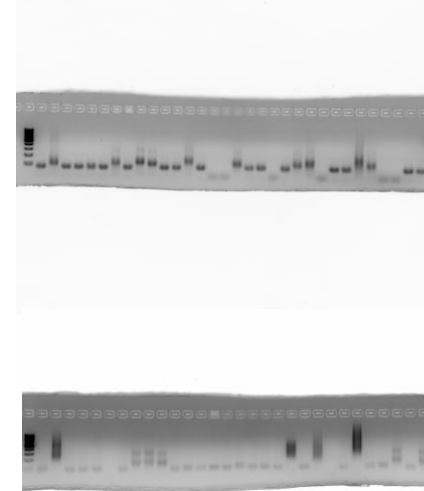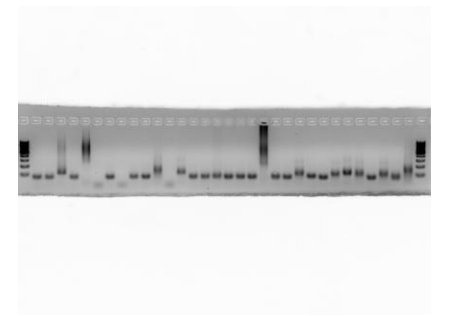



# Large Young Oocytes

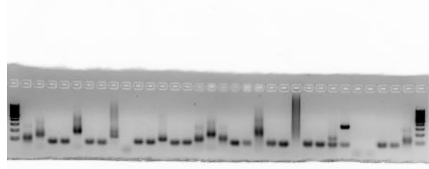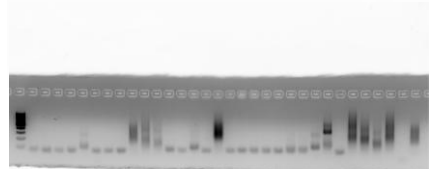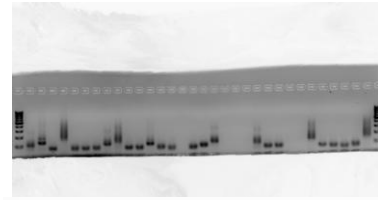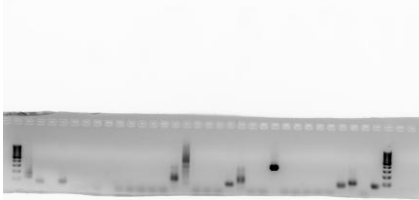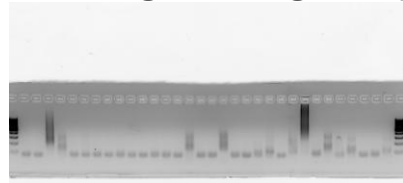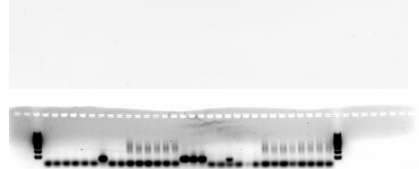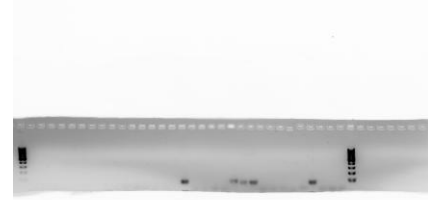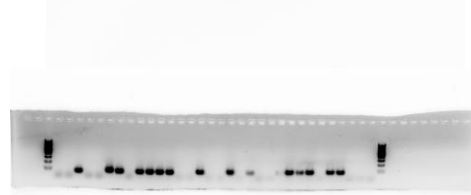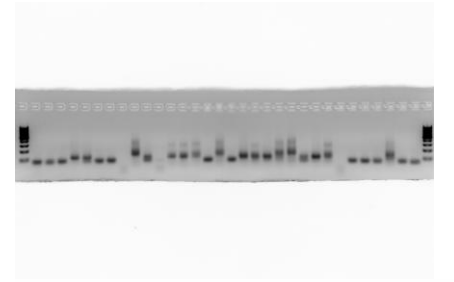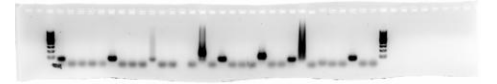

# Low $\Delta\Psi_m$ Young Oocytes

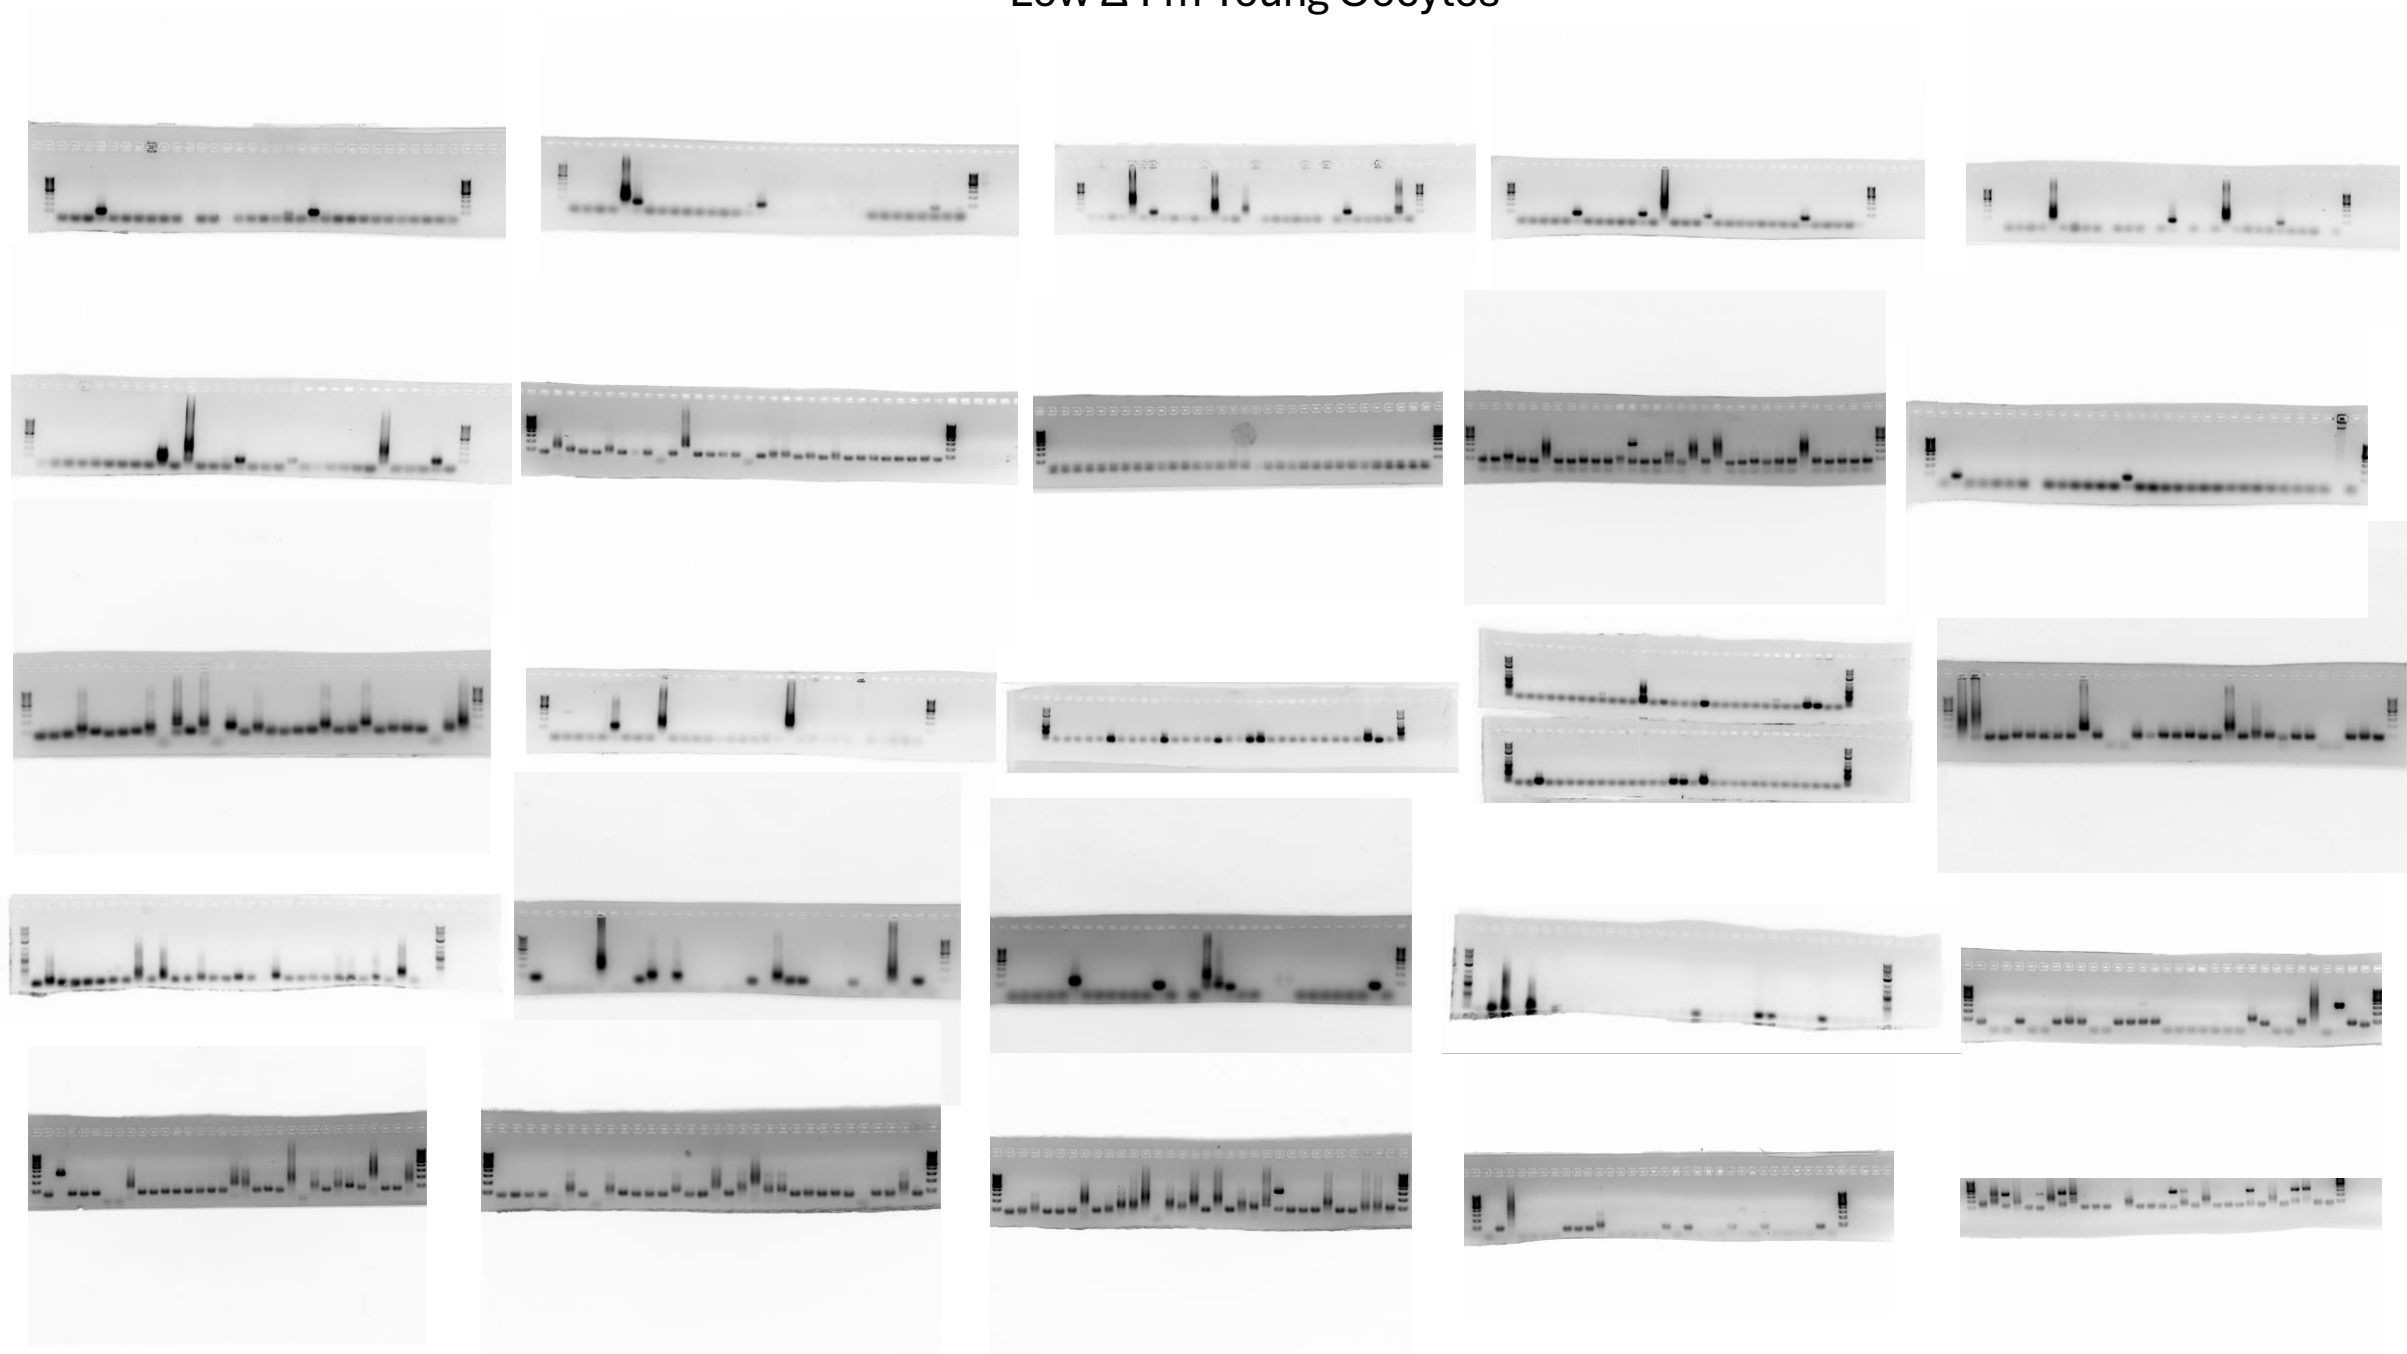

# Low $\Delta\Psi_m$ Young Oocyte

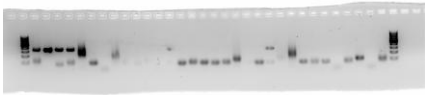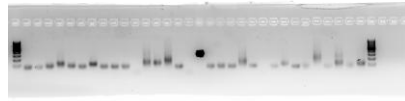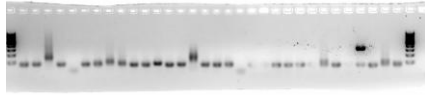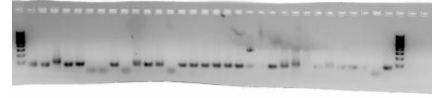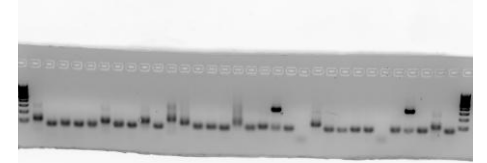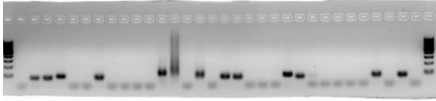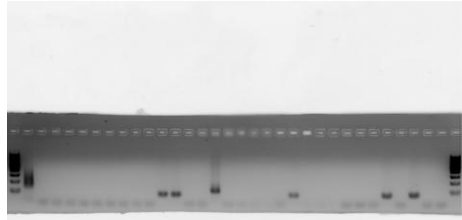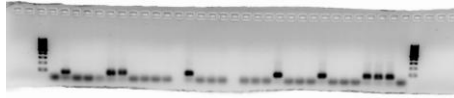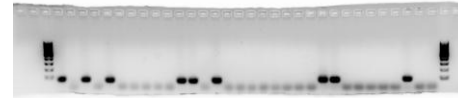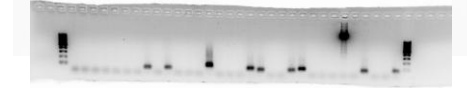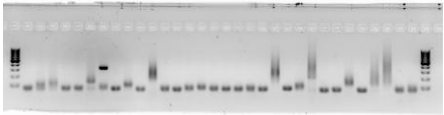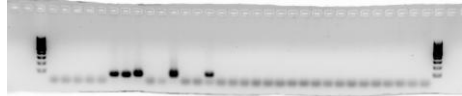

# High $\Delta\Psi_m$ Young Oocytes

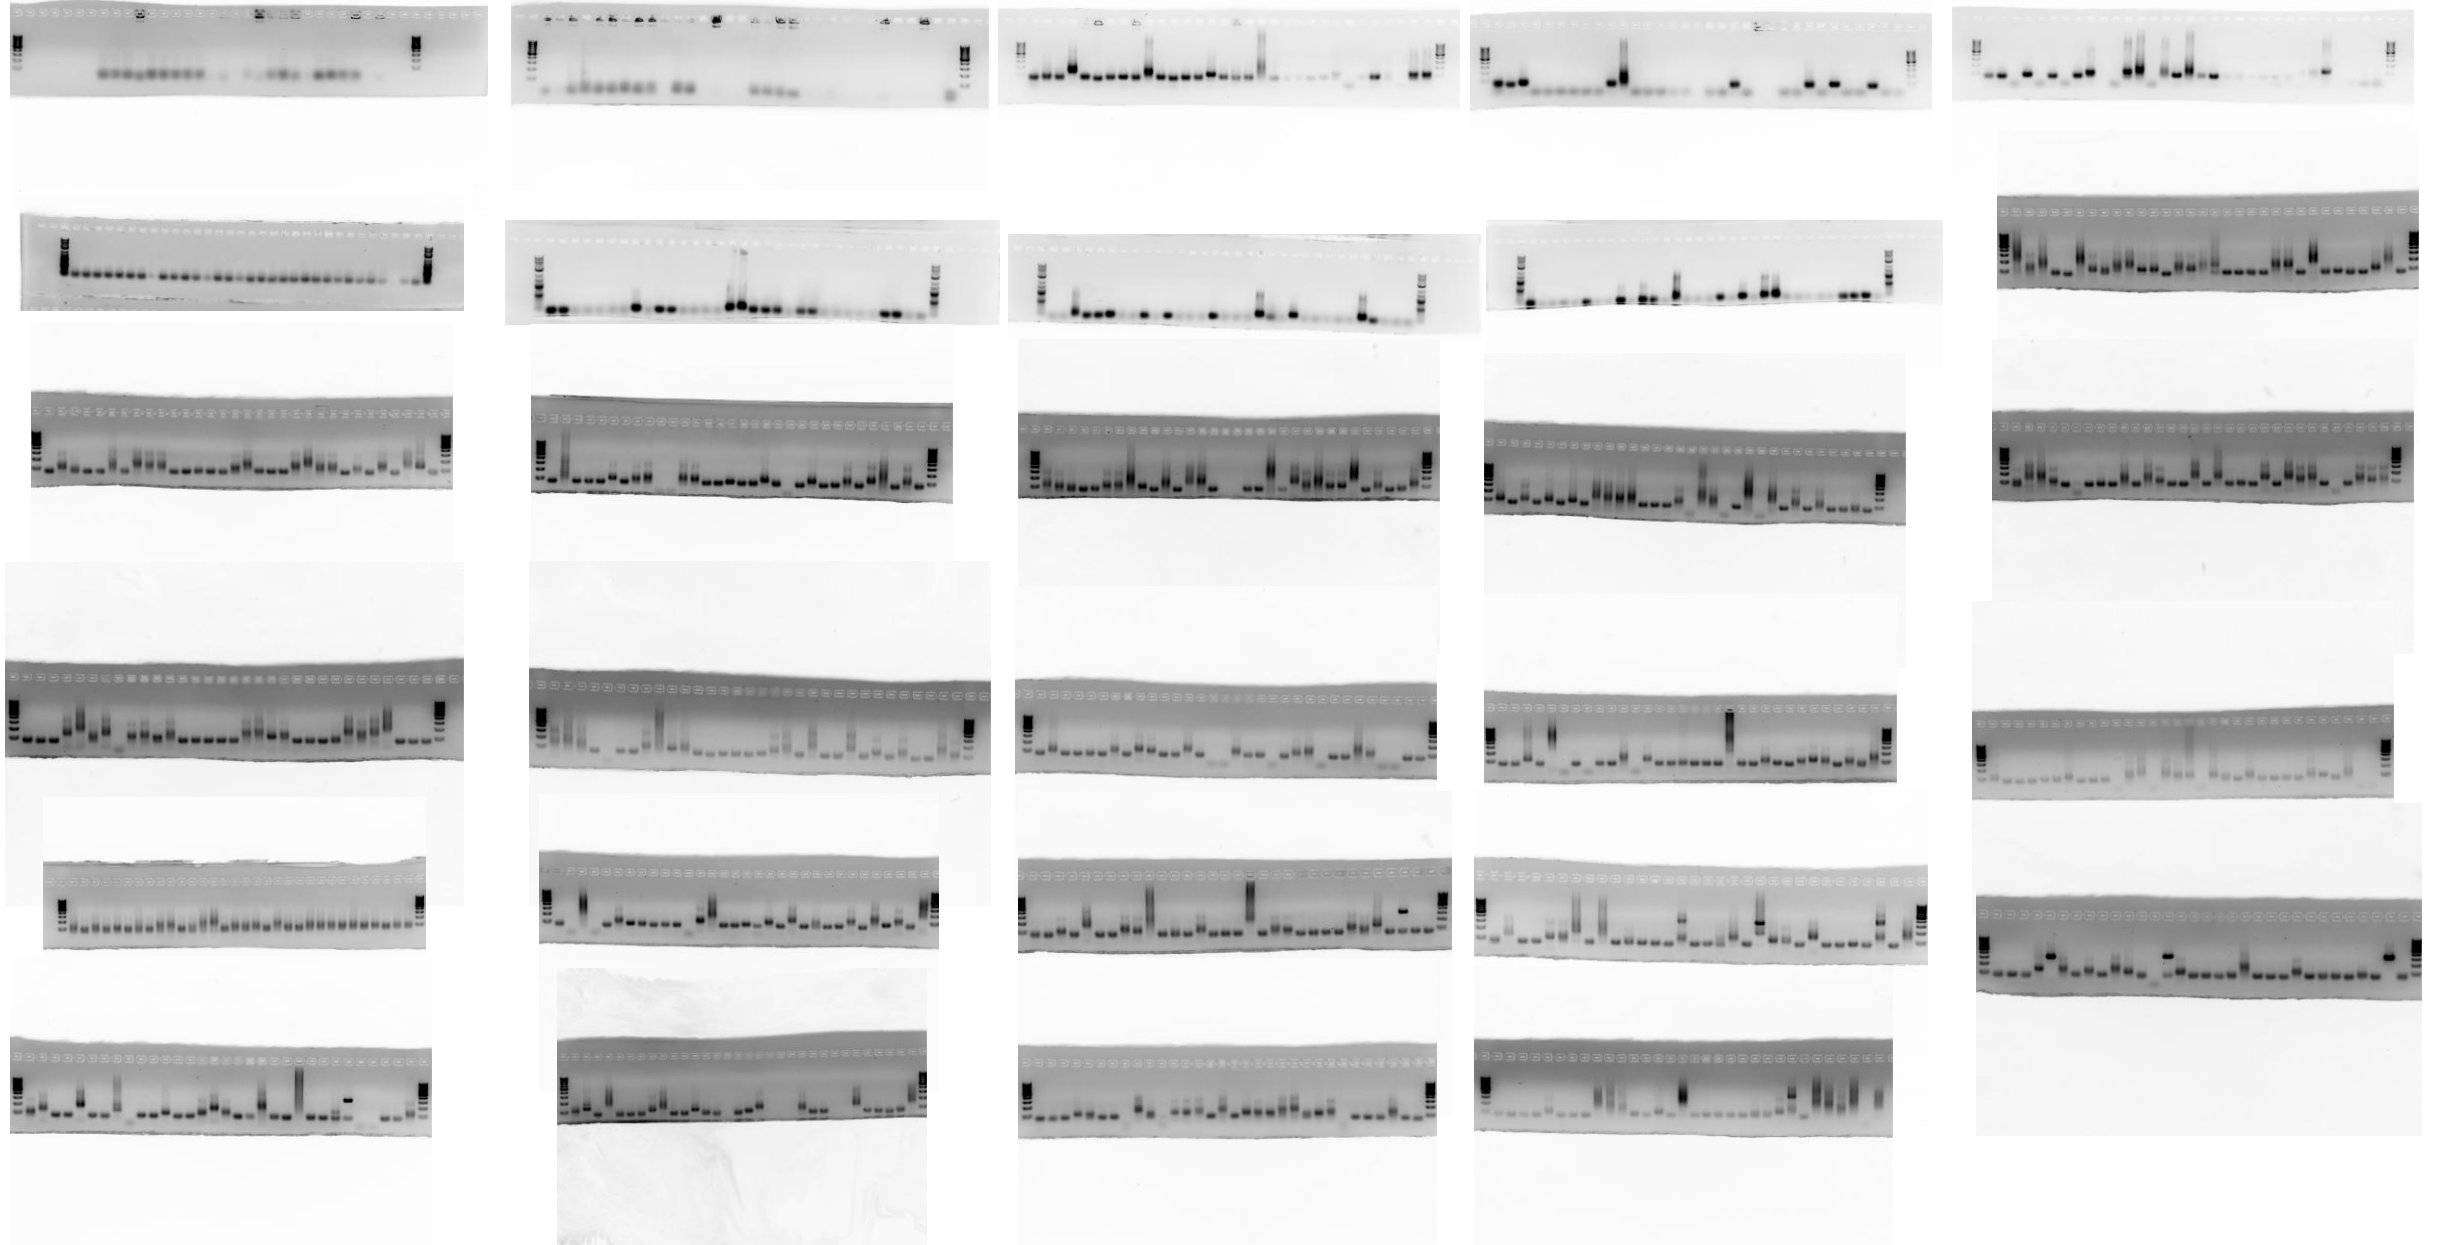

# High $\Delta\Psi_m$ Young Oocytes

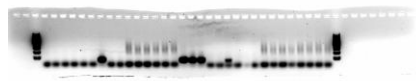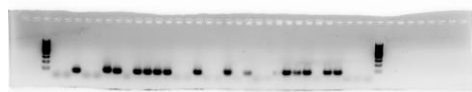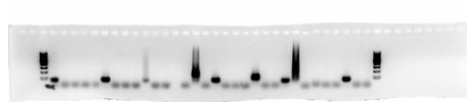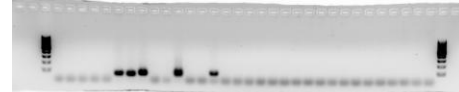

Supplement: Supplementary file 3 [file 61379e16a7c6b4e1a7fd3fba.pdf]
