# Supplementary material
Source: Research Square preprint supplement (doi:10.21203/rs.3.rs-9215979/v1)

# Young Cumulus Cells

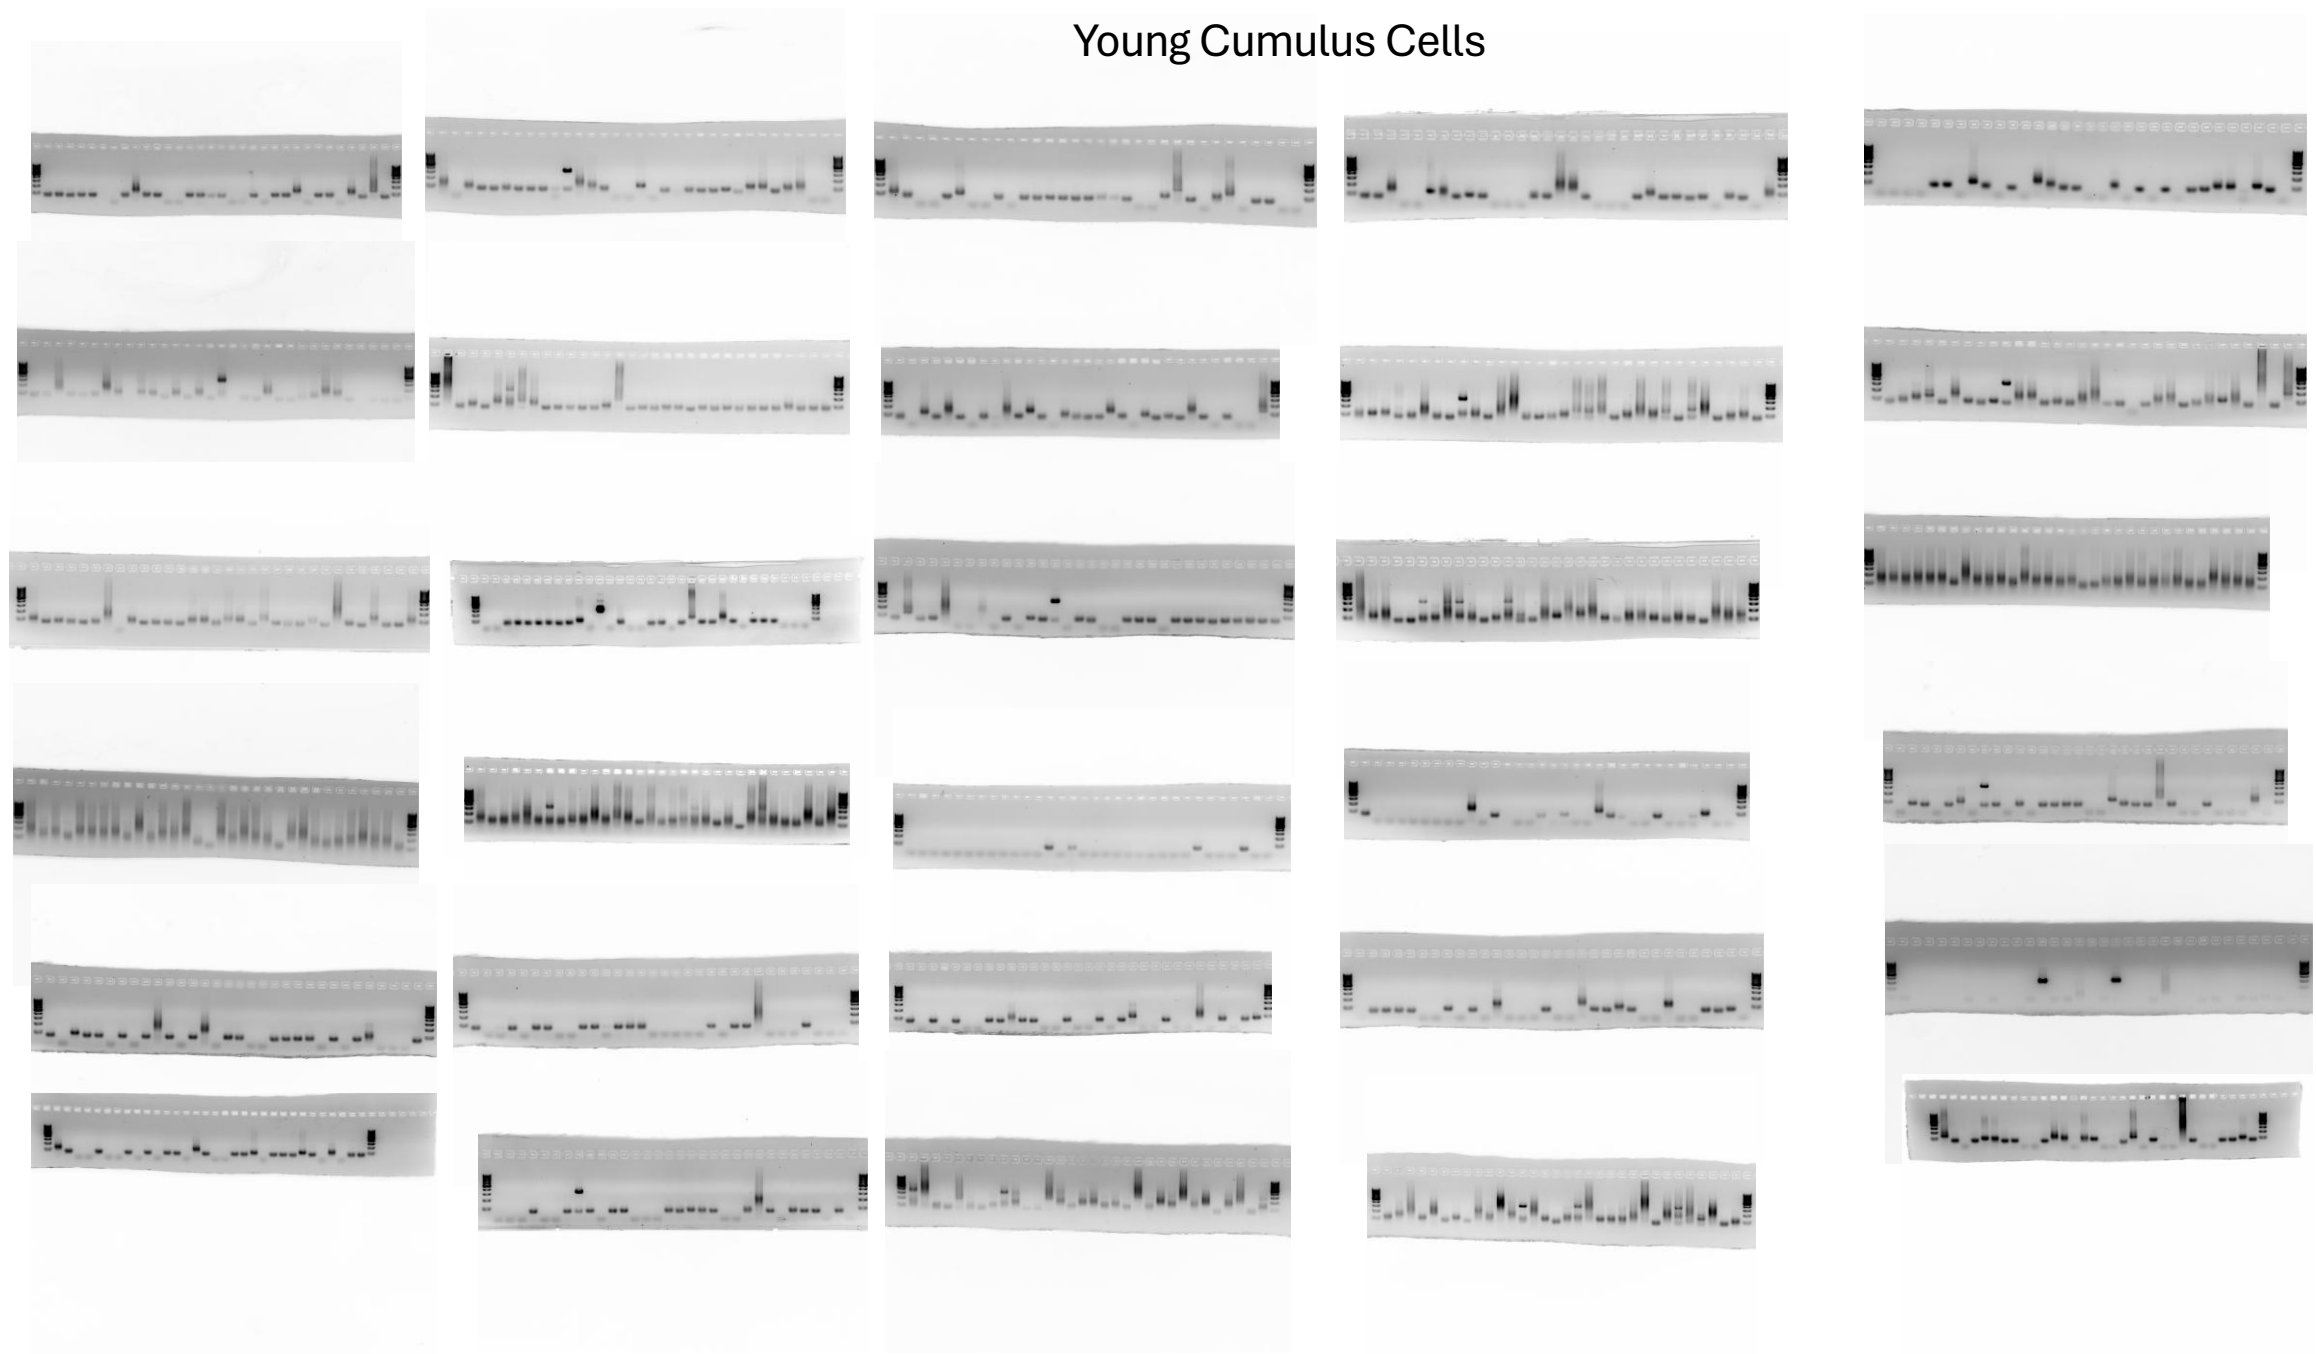

# Young Cumulus Cells

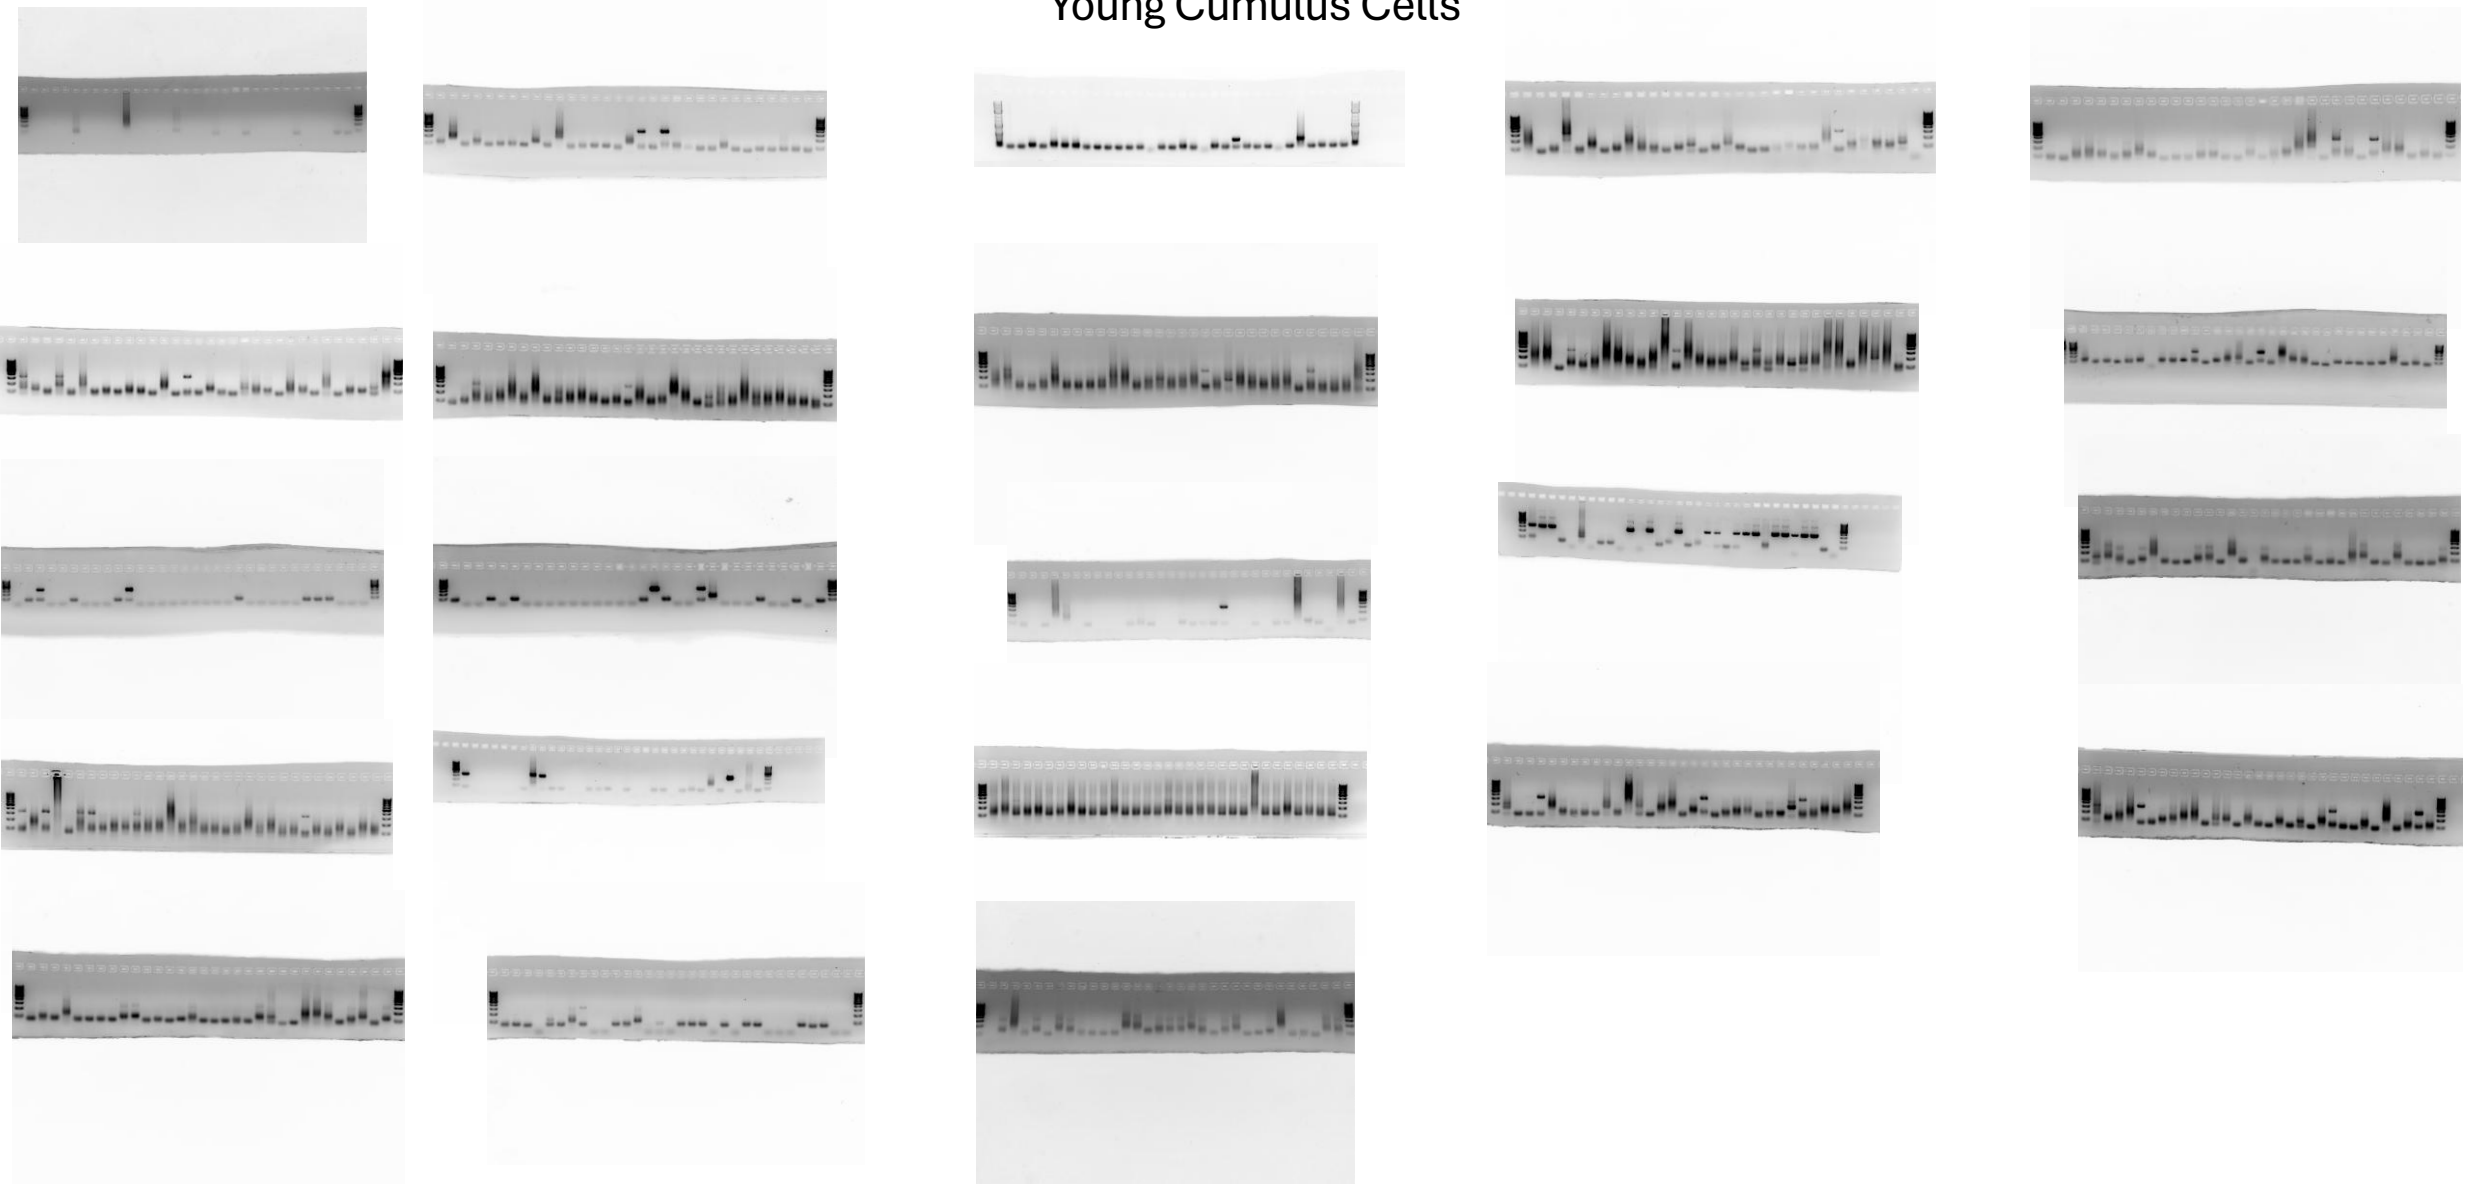

# Small Young Cumulus Cells

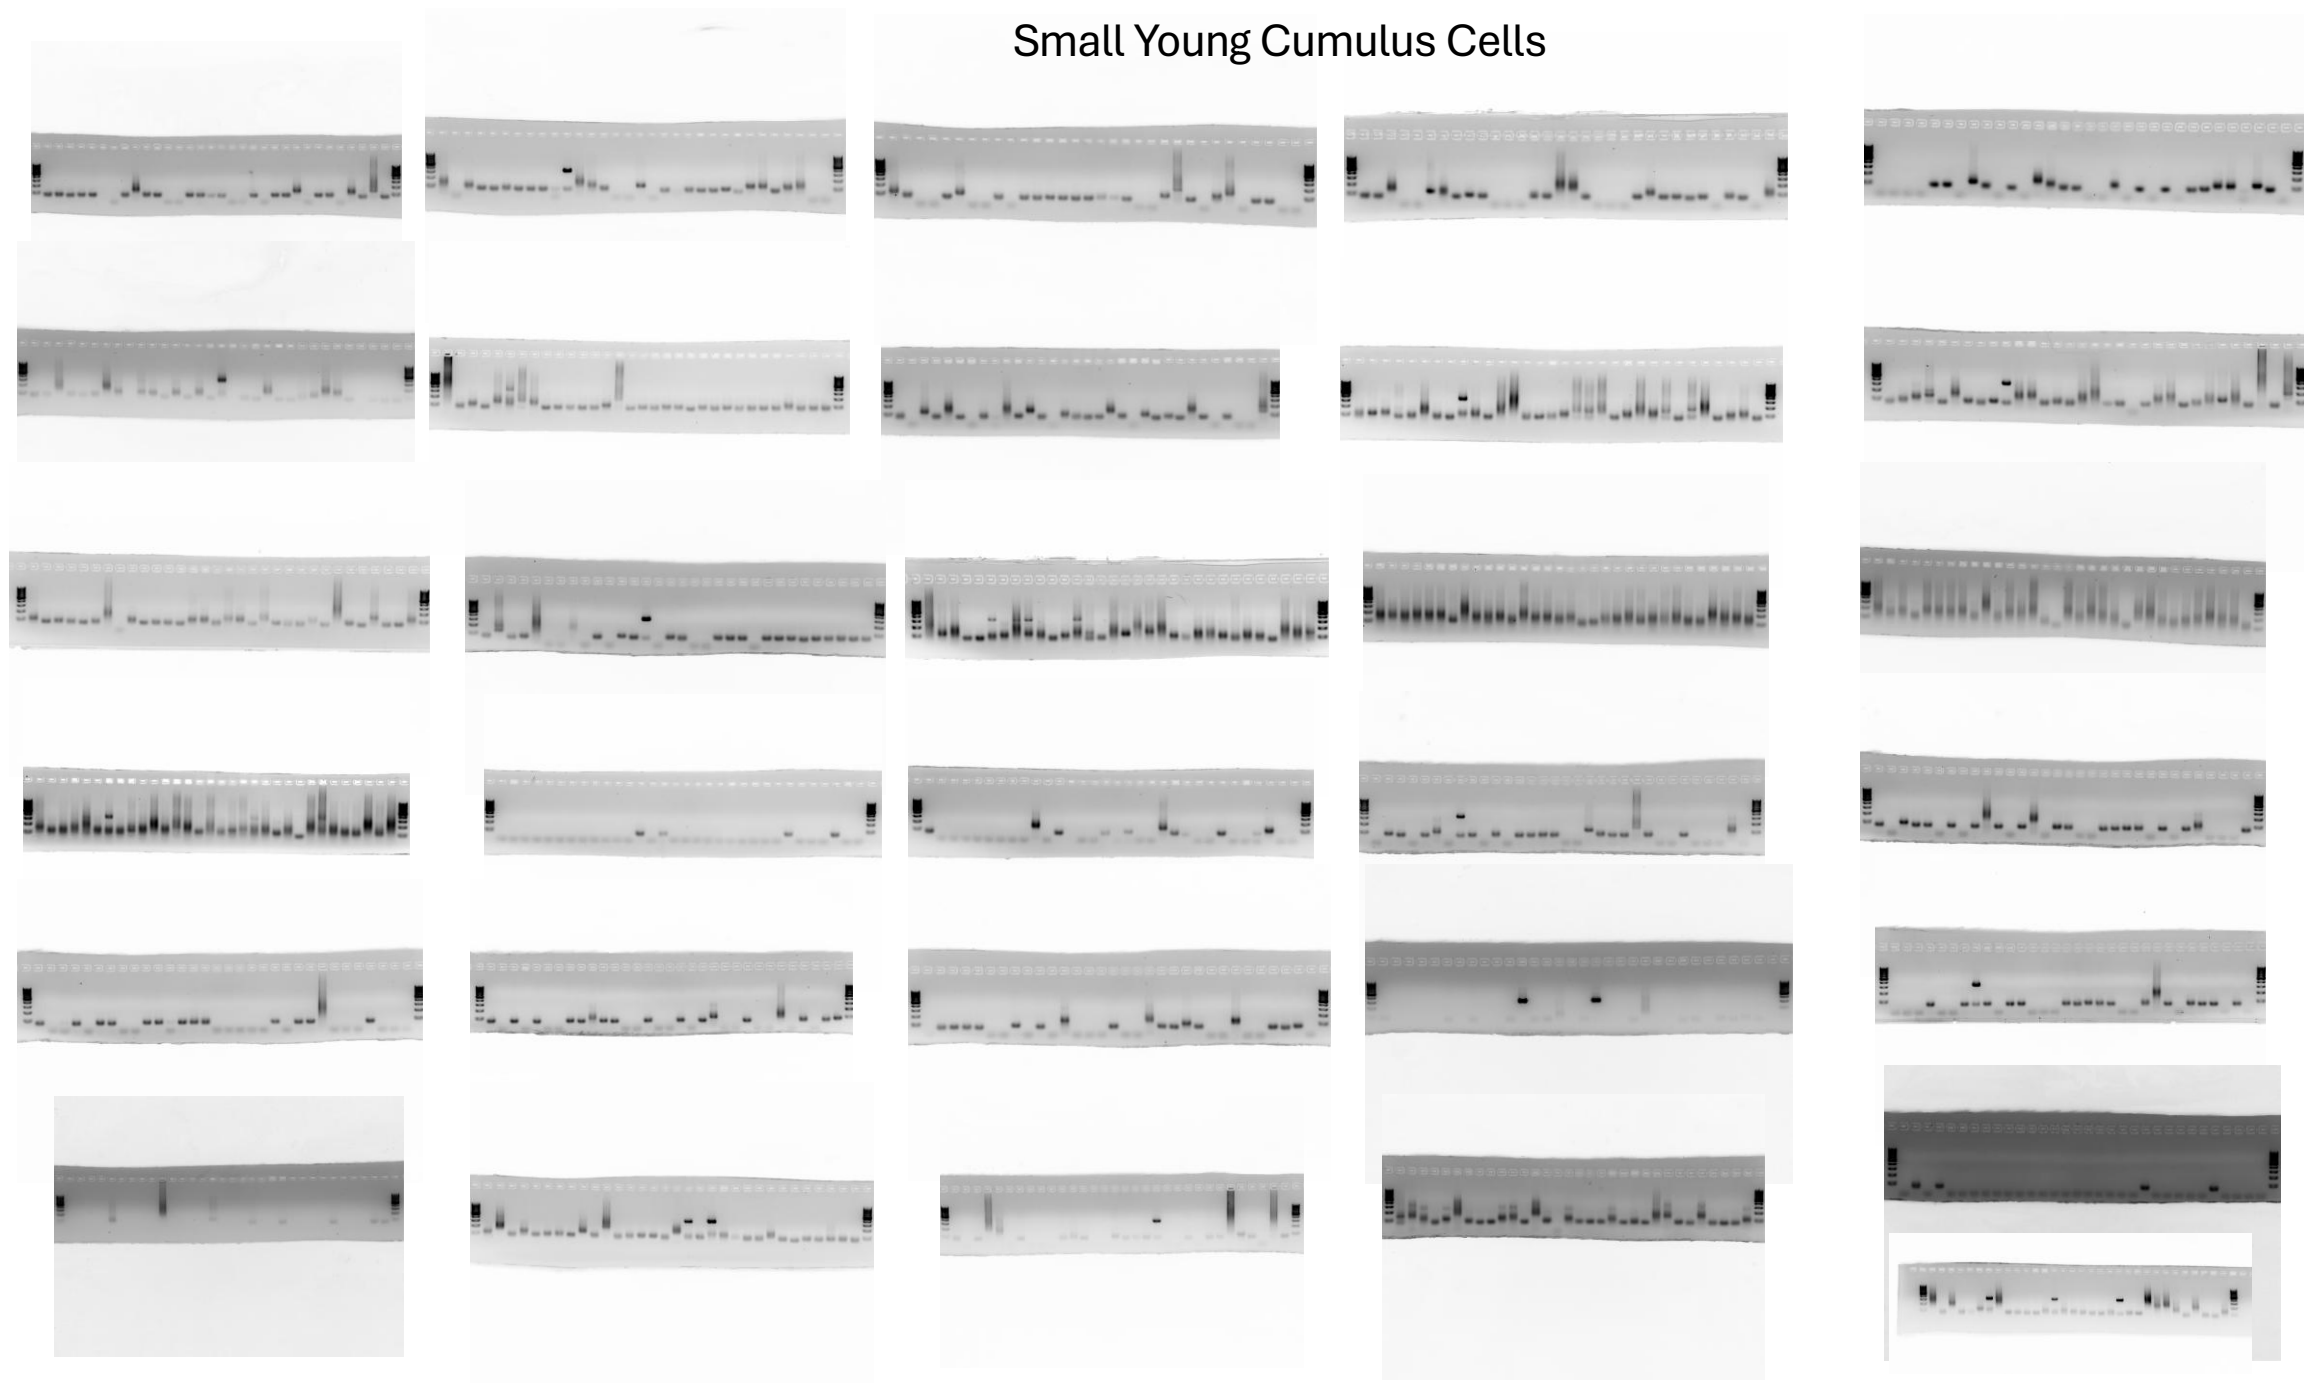



# Large Young Cumulus Cells

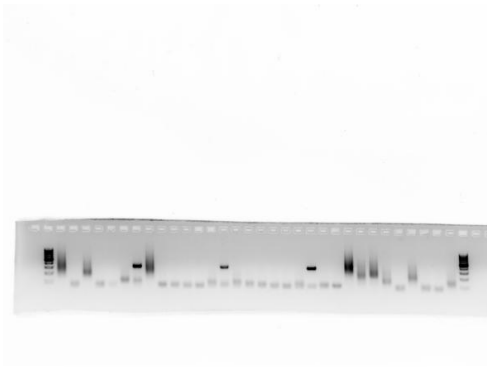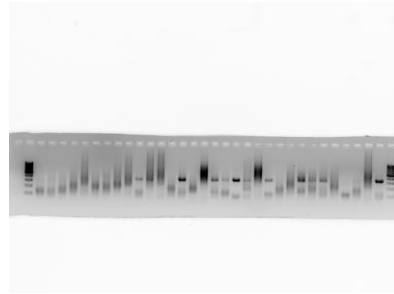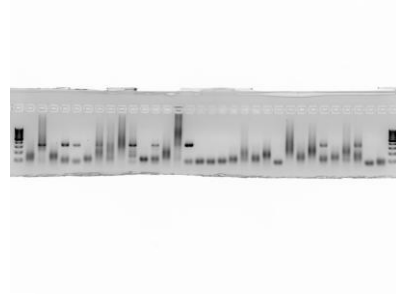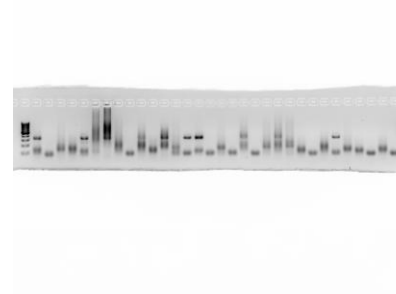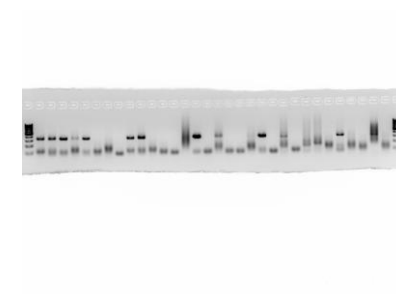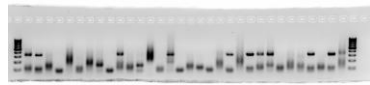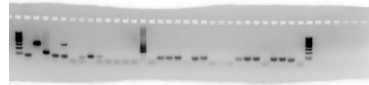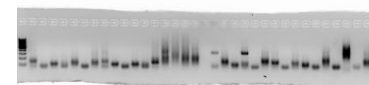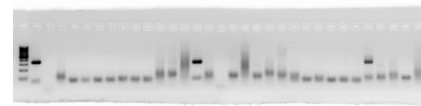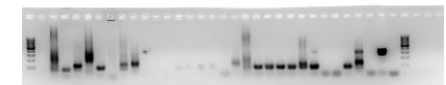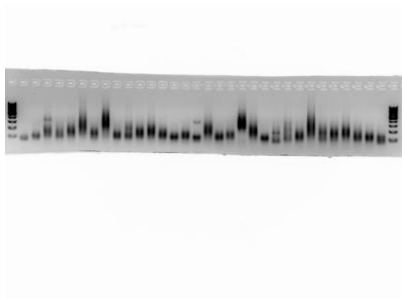

# Low $\Delta\Psi_m$ Young Cumulus Cells

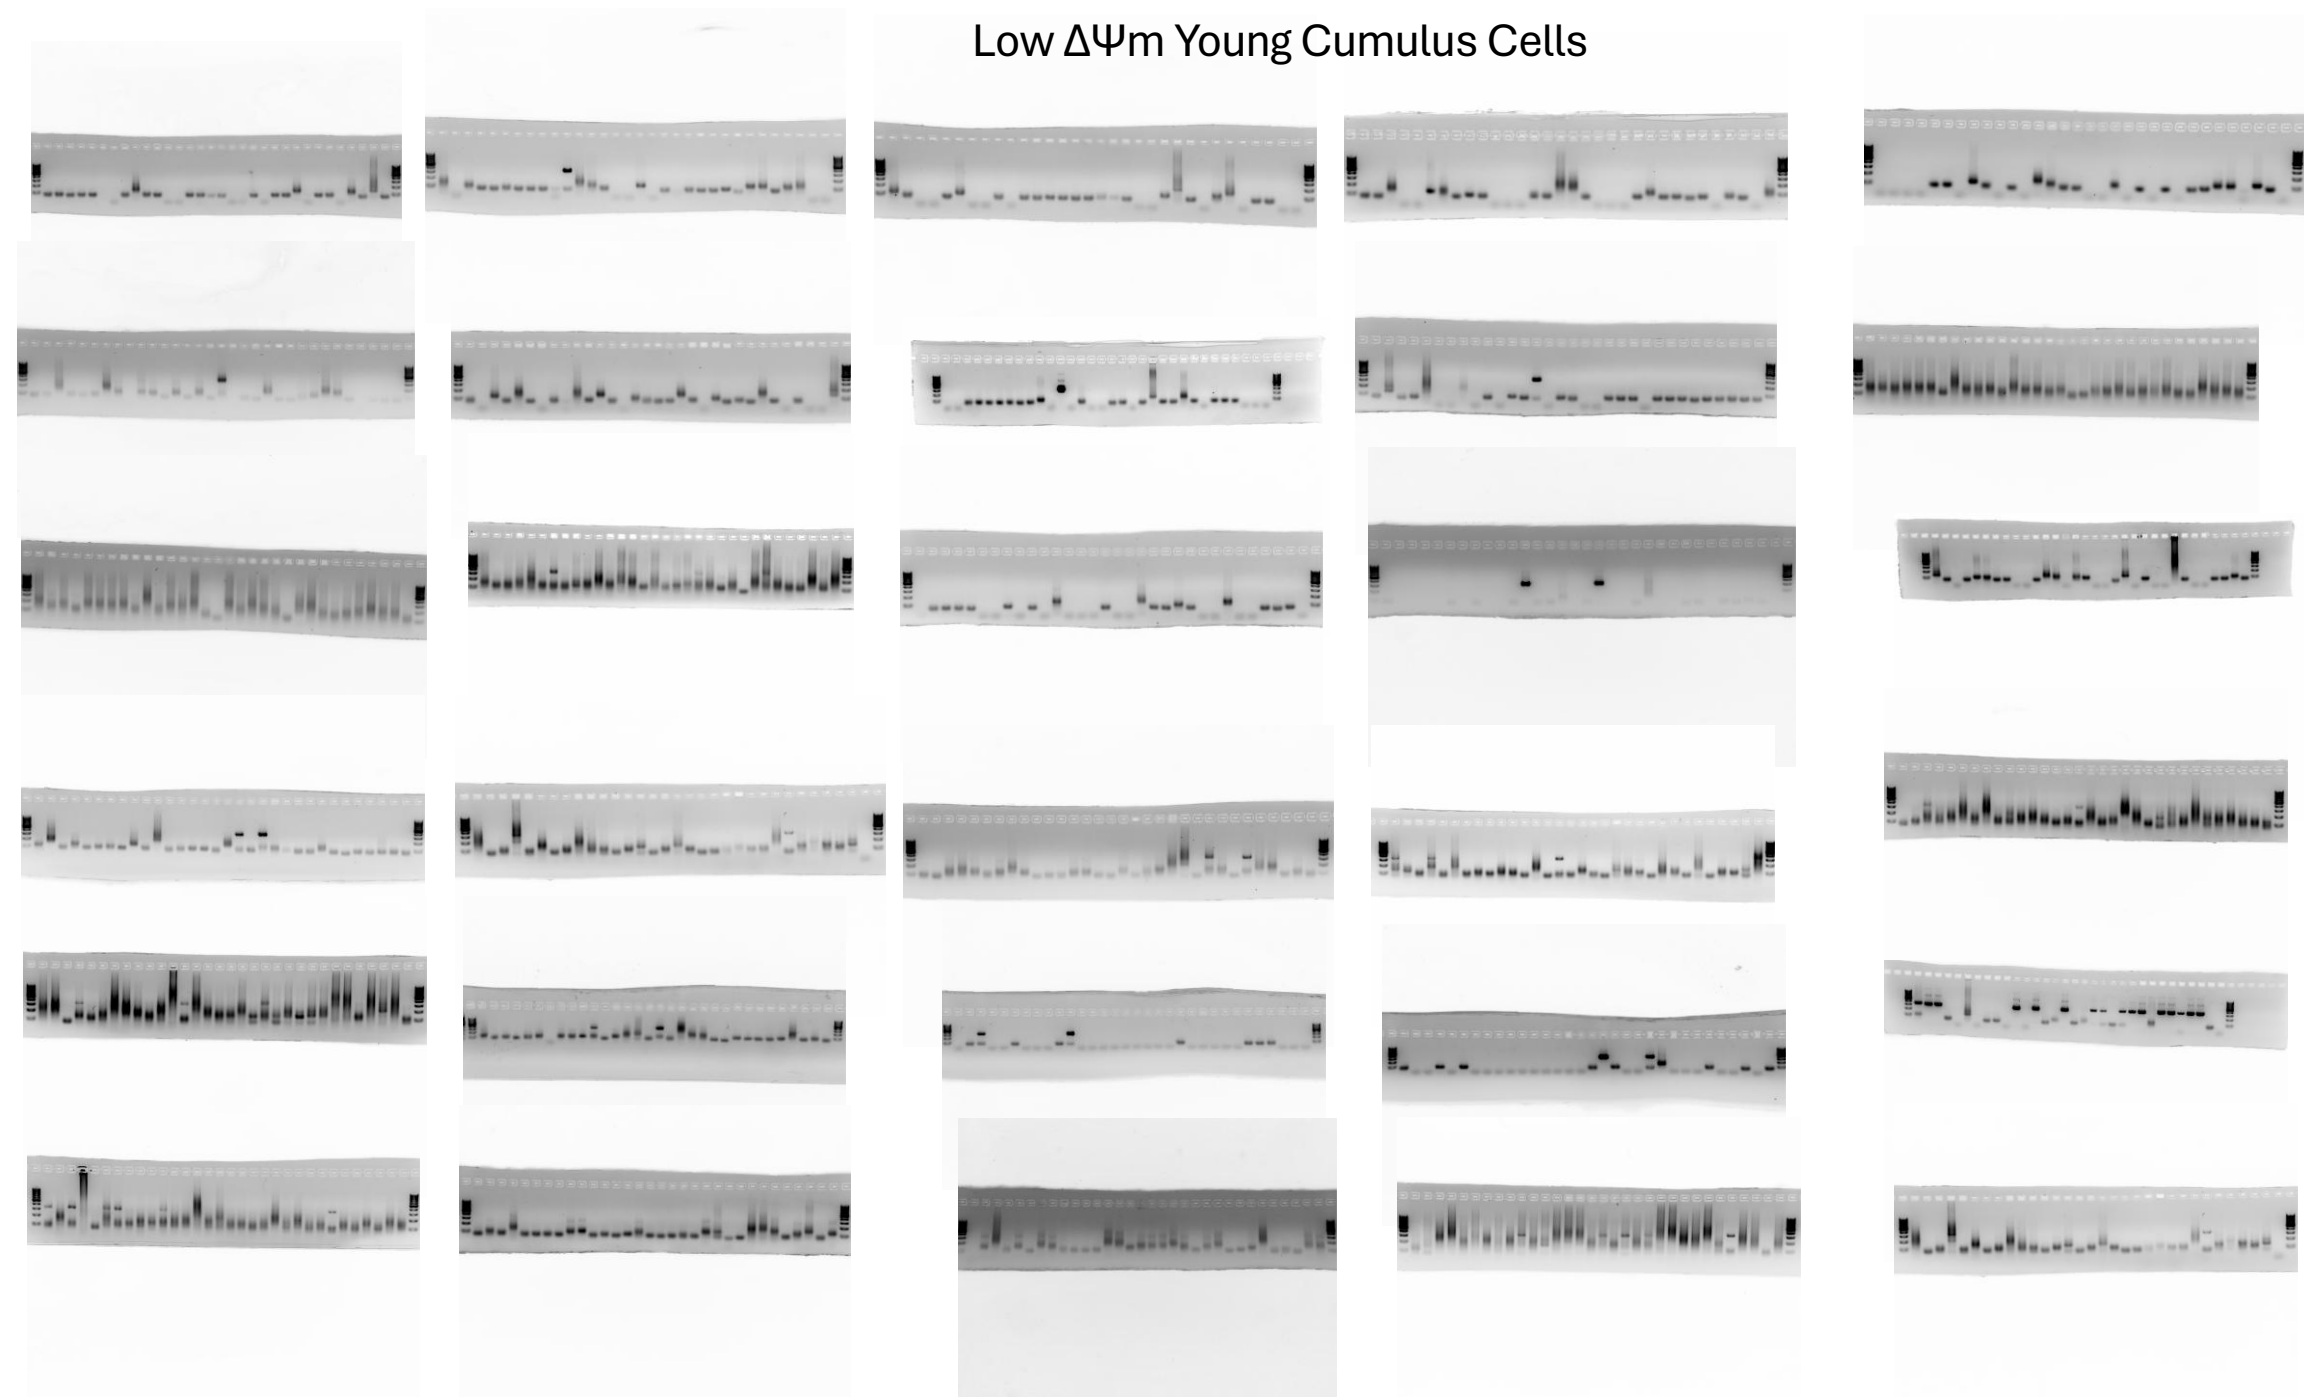

# Low $\Delta\Psi_m$ Young Cumulus Cells

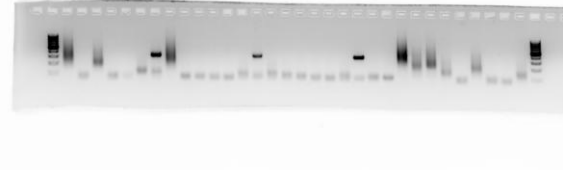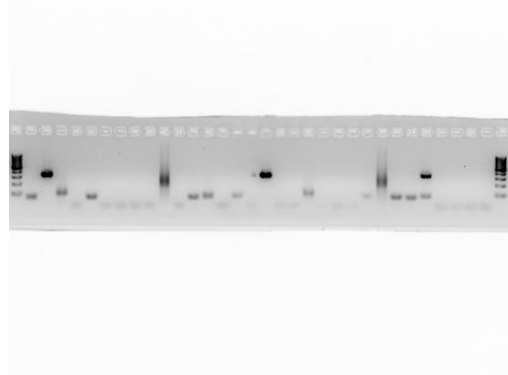

# High $\Delta\Psi_m$ Young Cumulus Cells

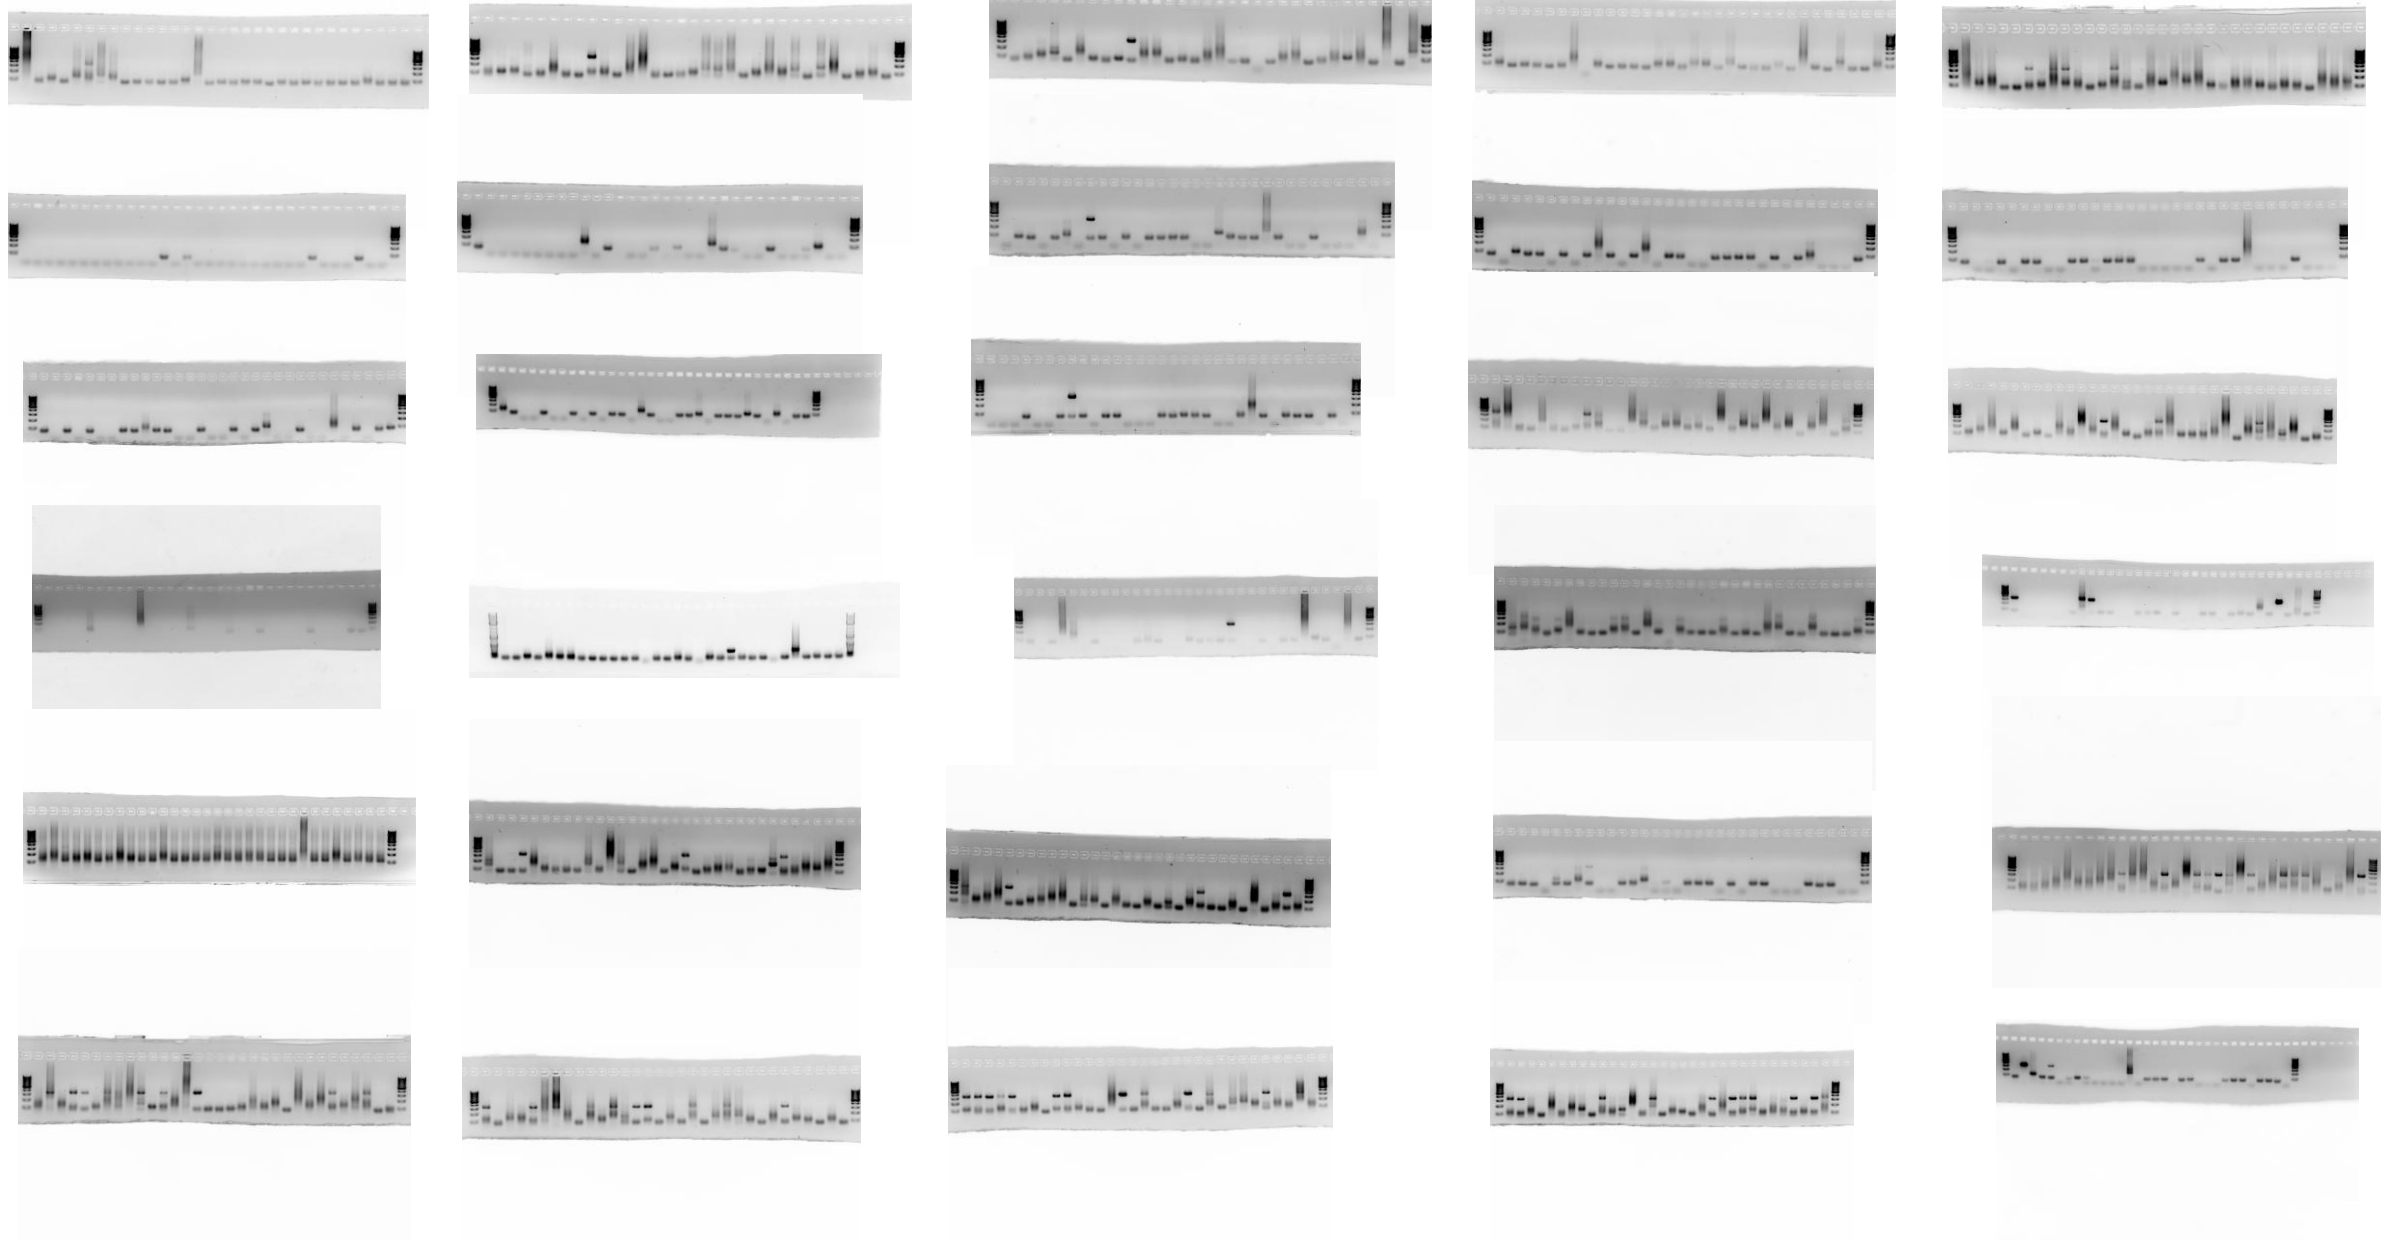

# High $\Delta\Psi_m$ Young Cumulus Cells

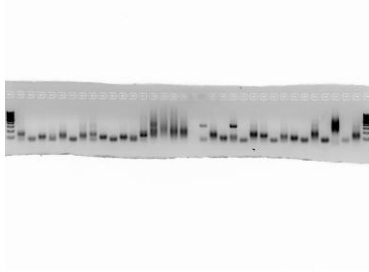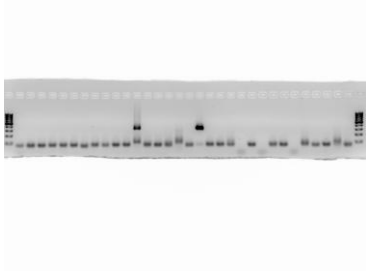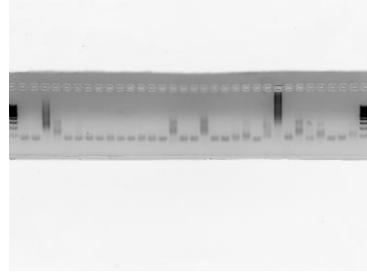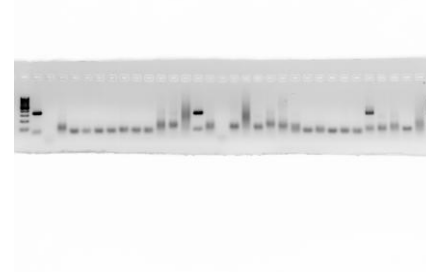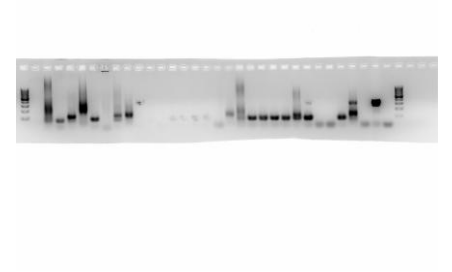

Supplement: Supplementary file 4 [file d9efd33525ceeaddf230198f.pdf]
