# Supplementary material
Source: Research Square preprint supplement (doi:10.21203/rs.3.rs-9215979/v1)

# Aged Oocytes

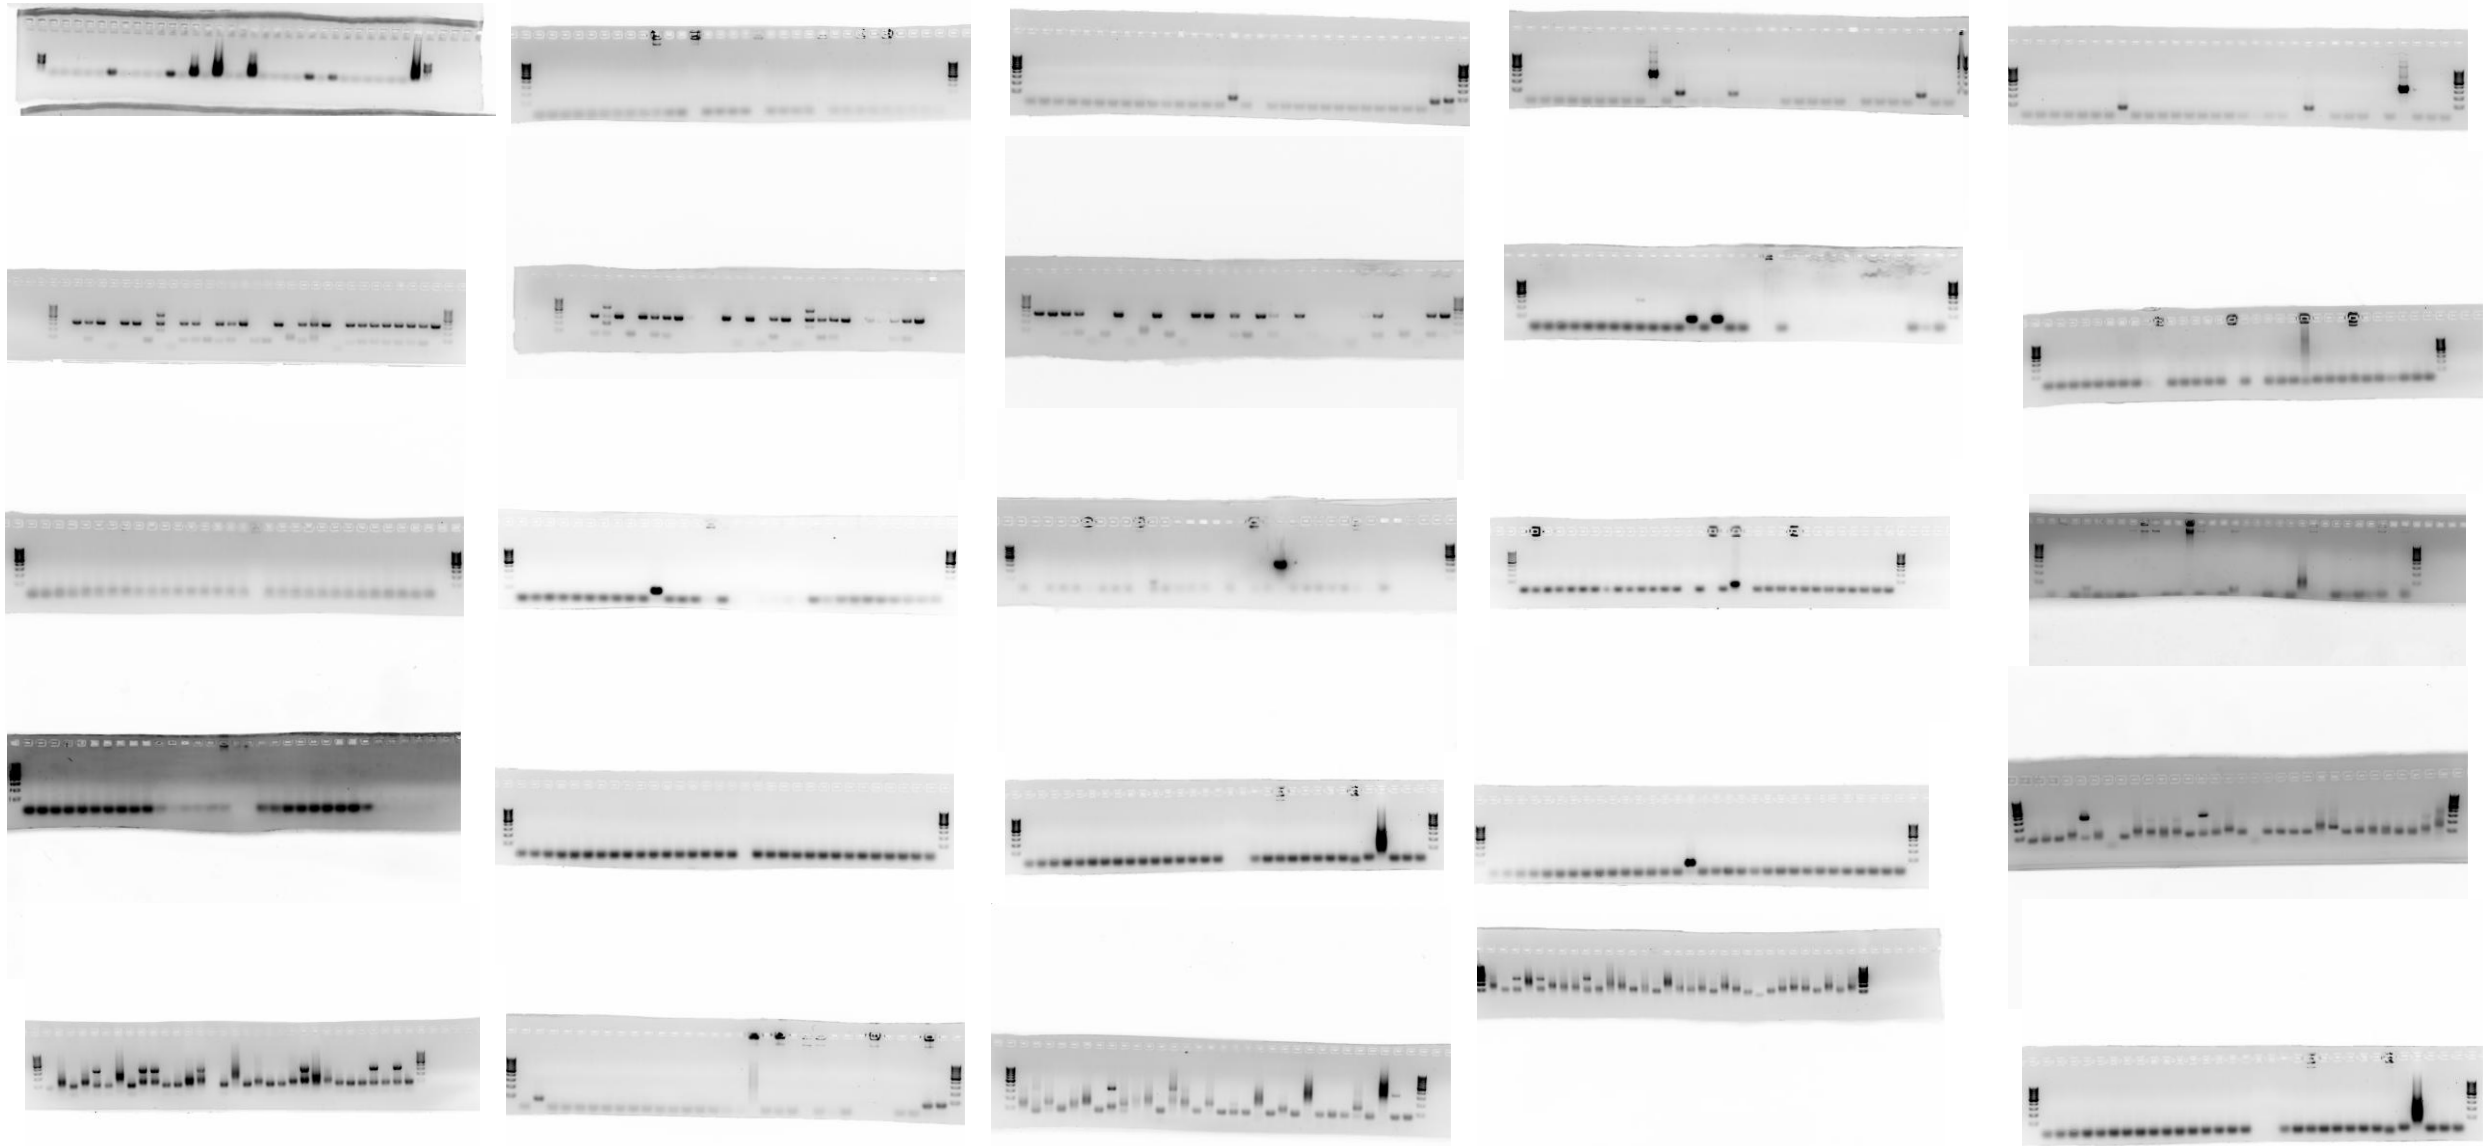





# Small Aged Oocytes

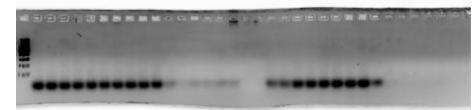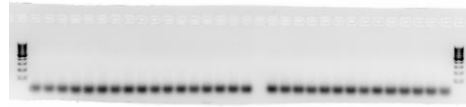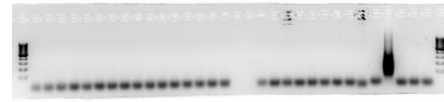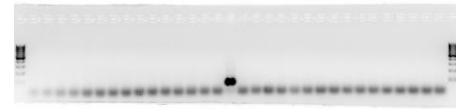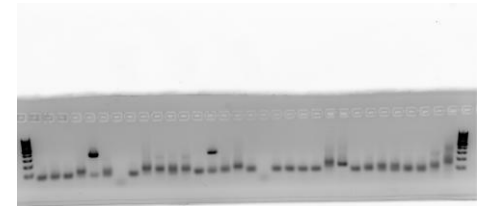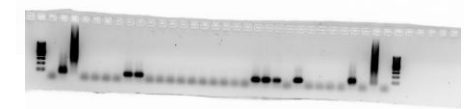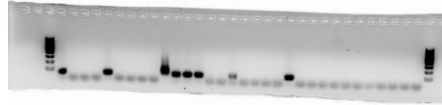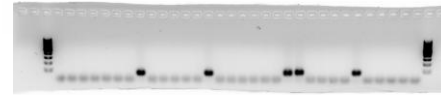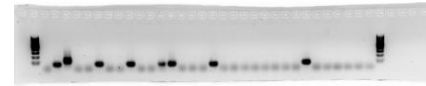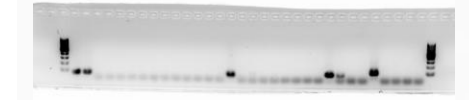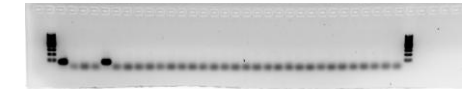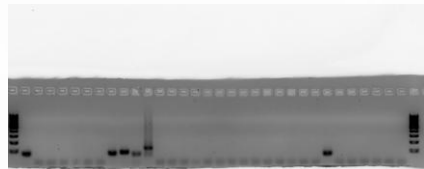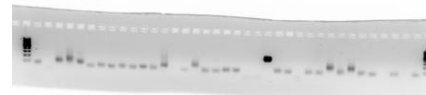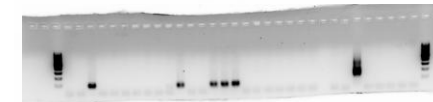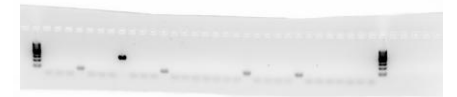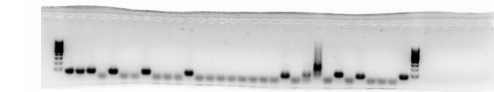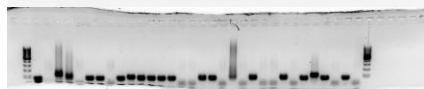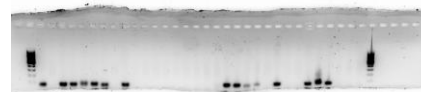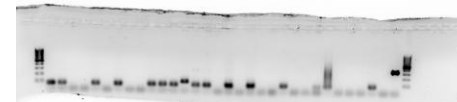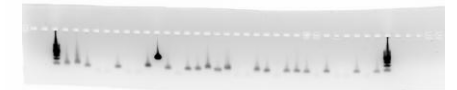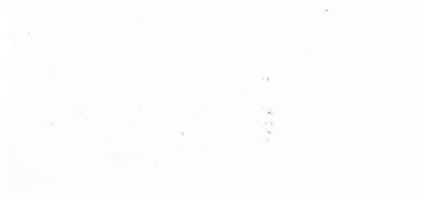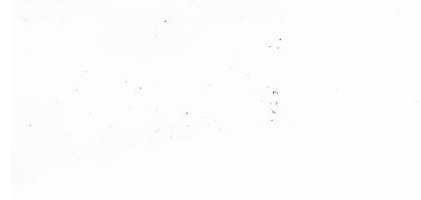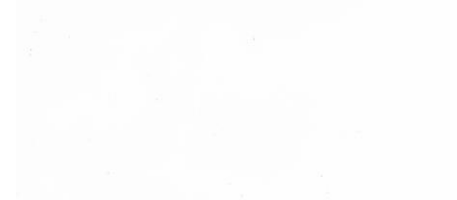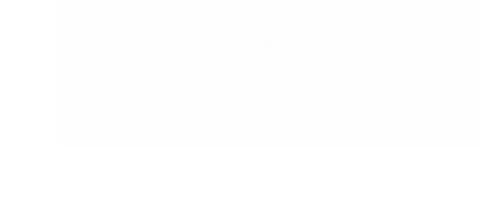

# Large Aged Oocytes

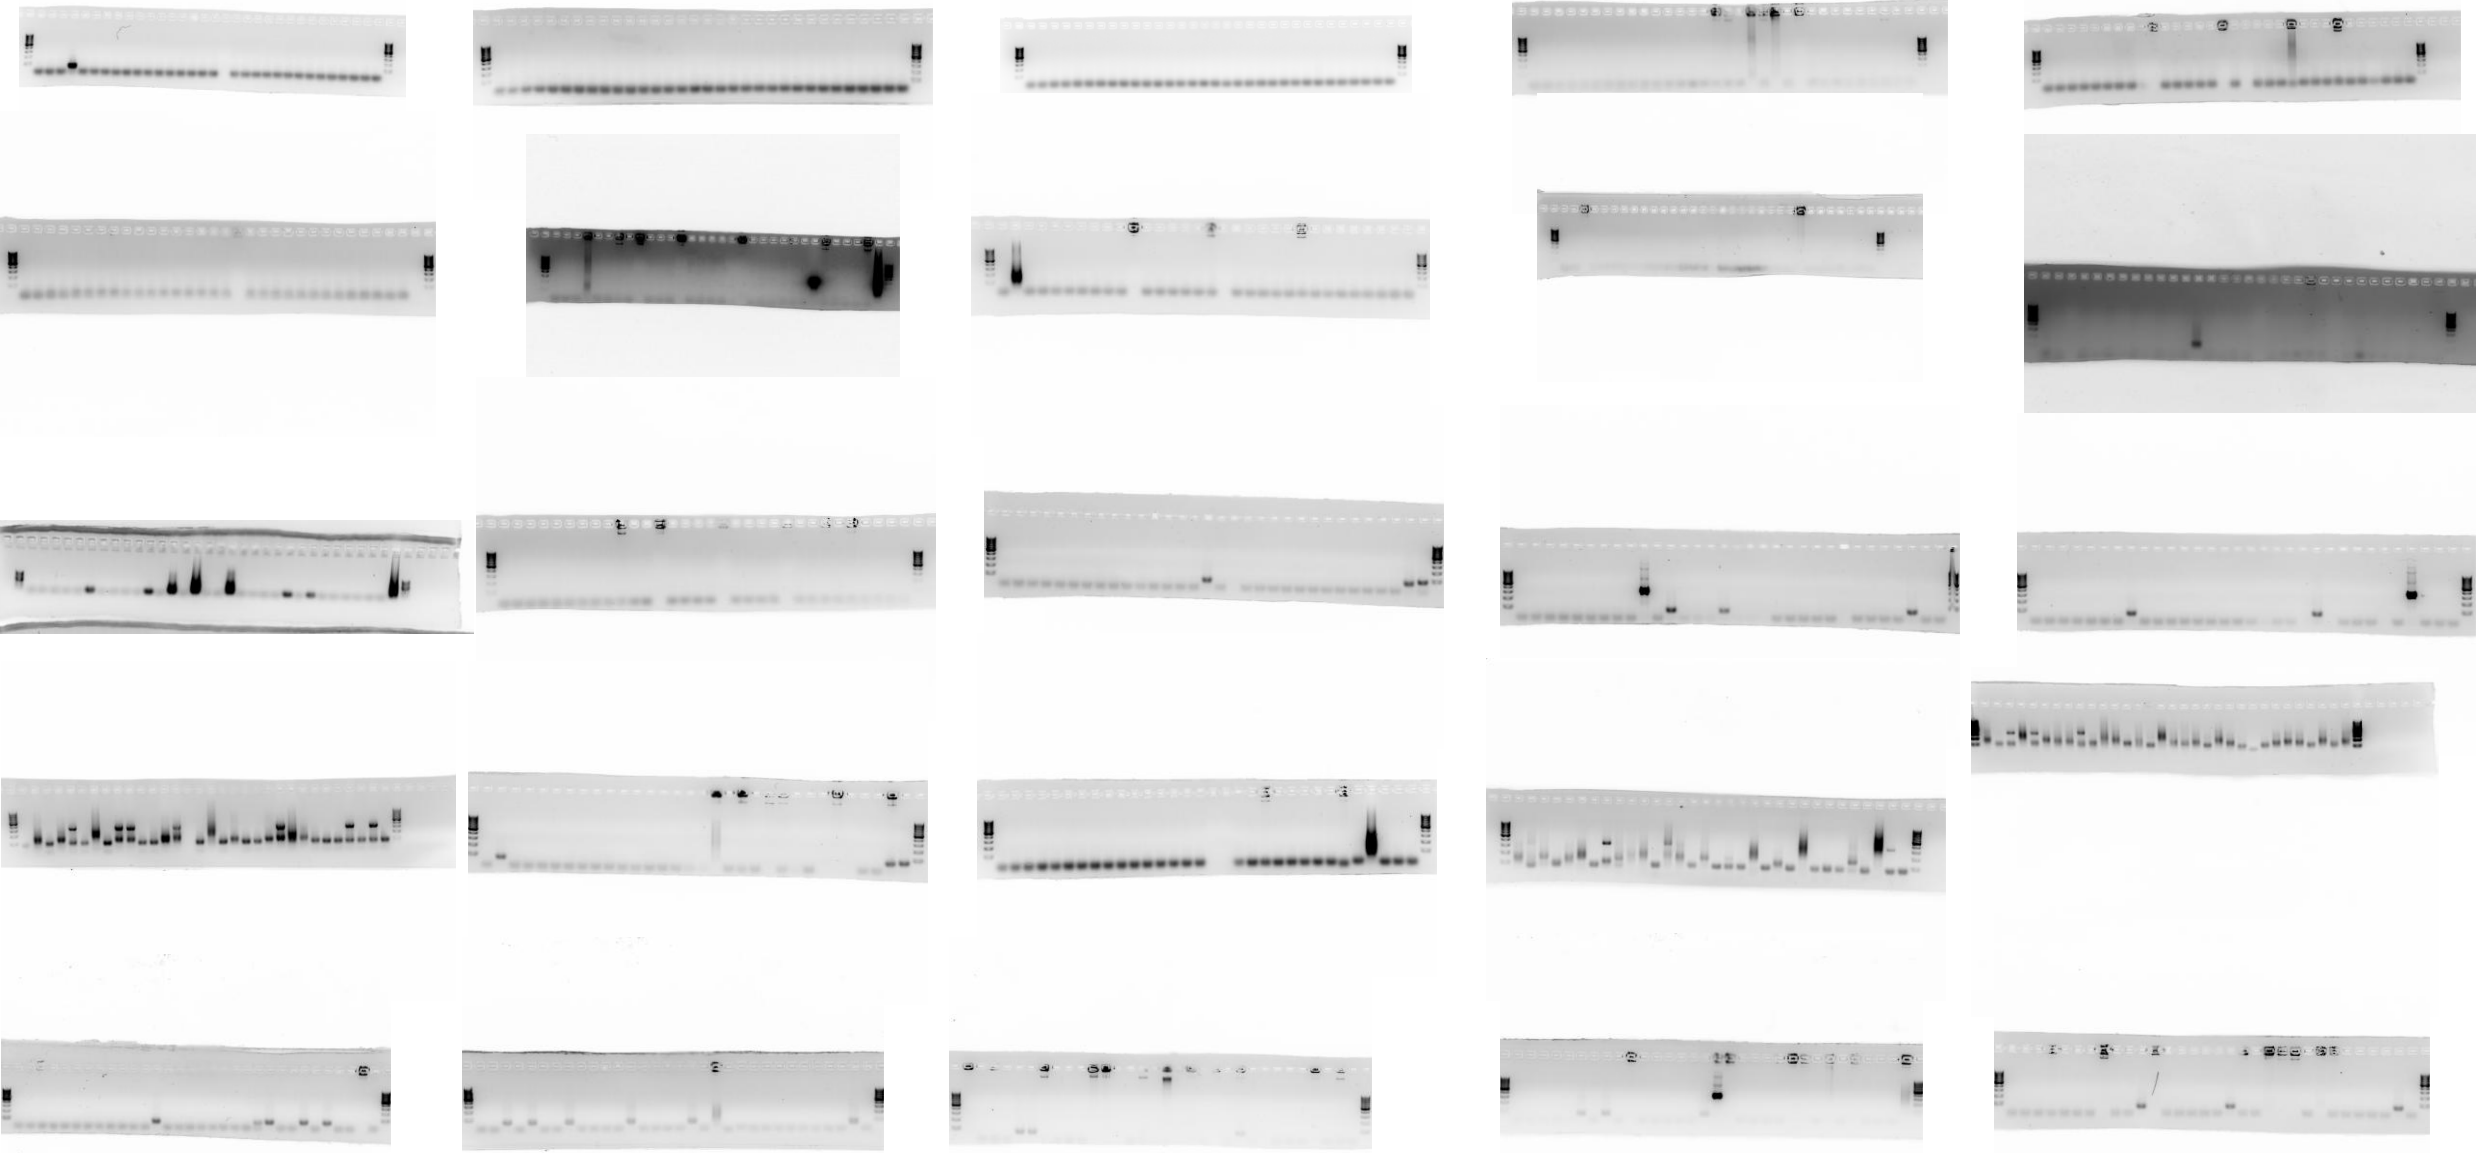

# Large Aged Oocytes

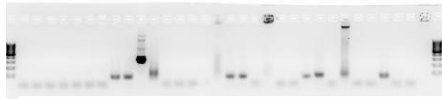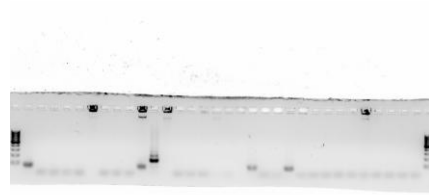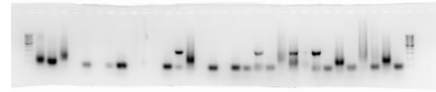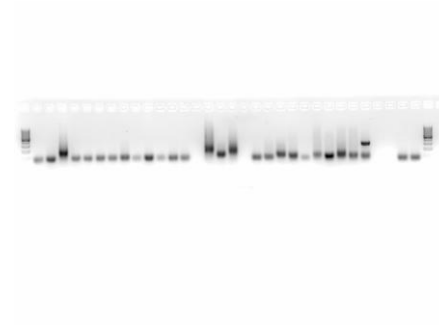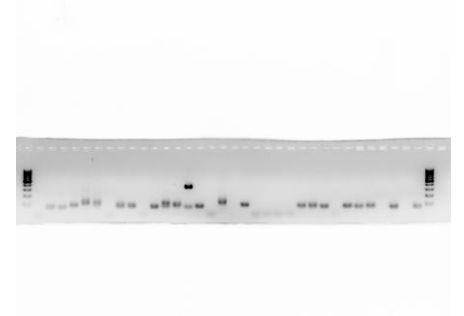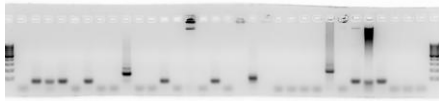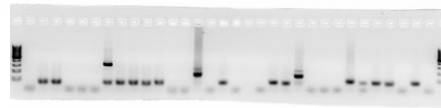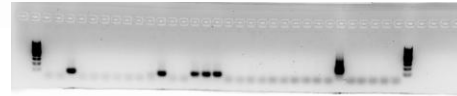



# Low $\Delta\Psi_m$ Aged Oocytes

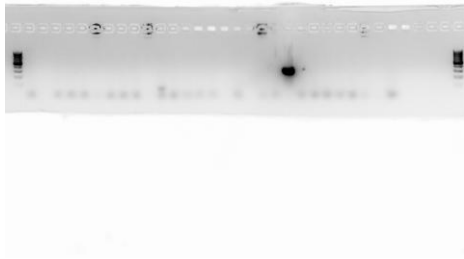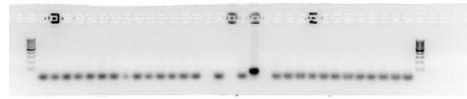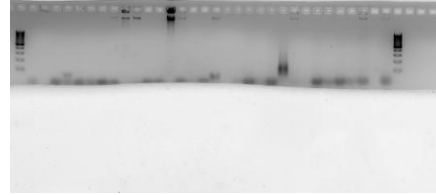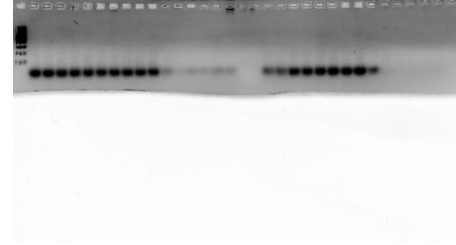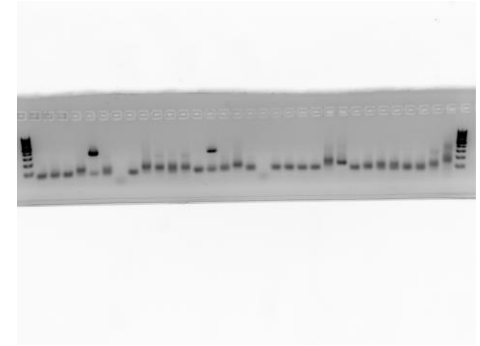

# High $\Delta\Psi_m$ Aged Oocytes

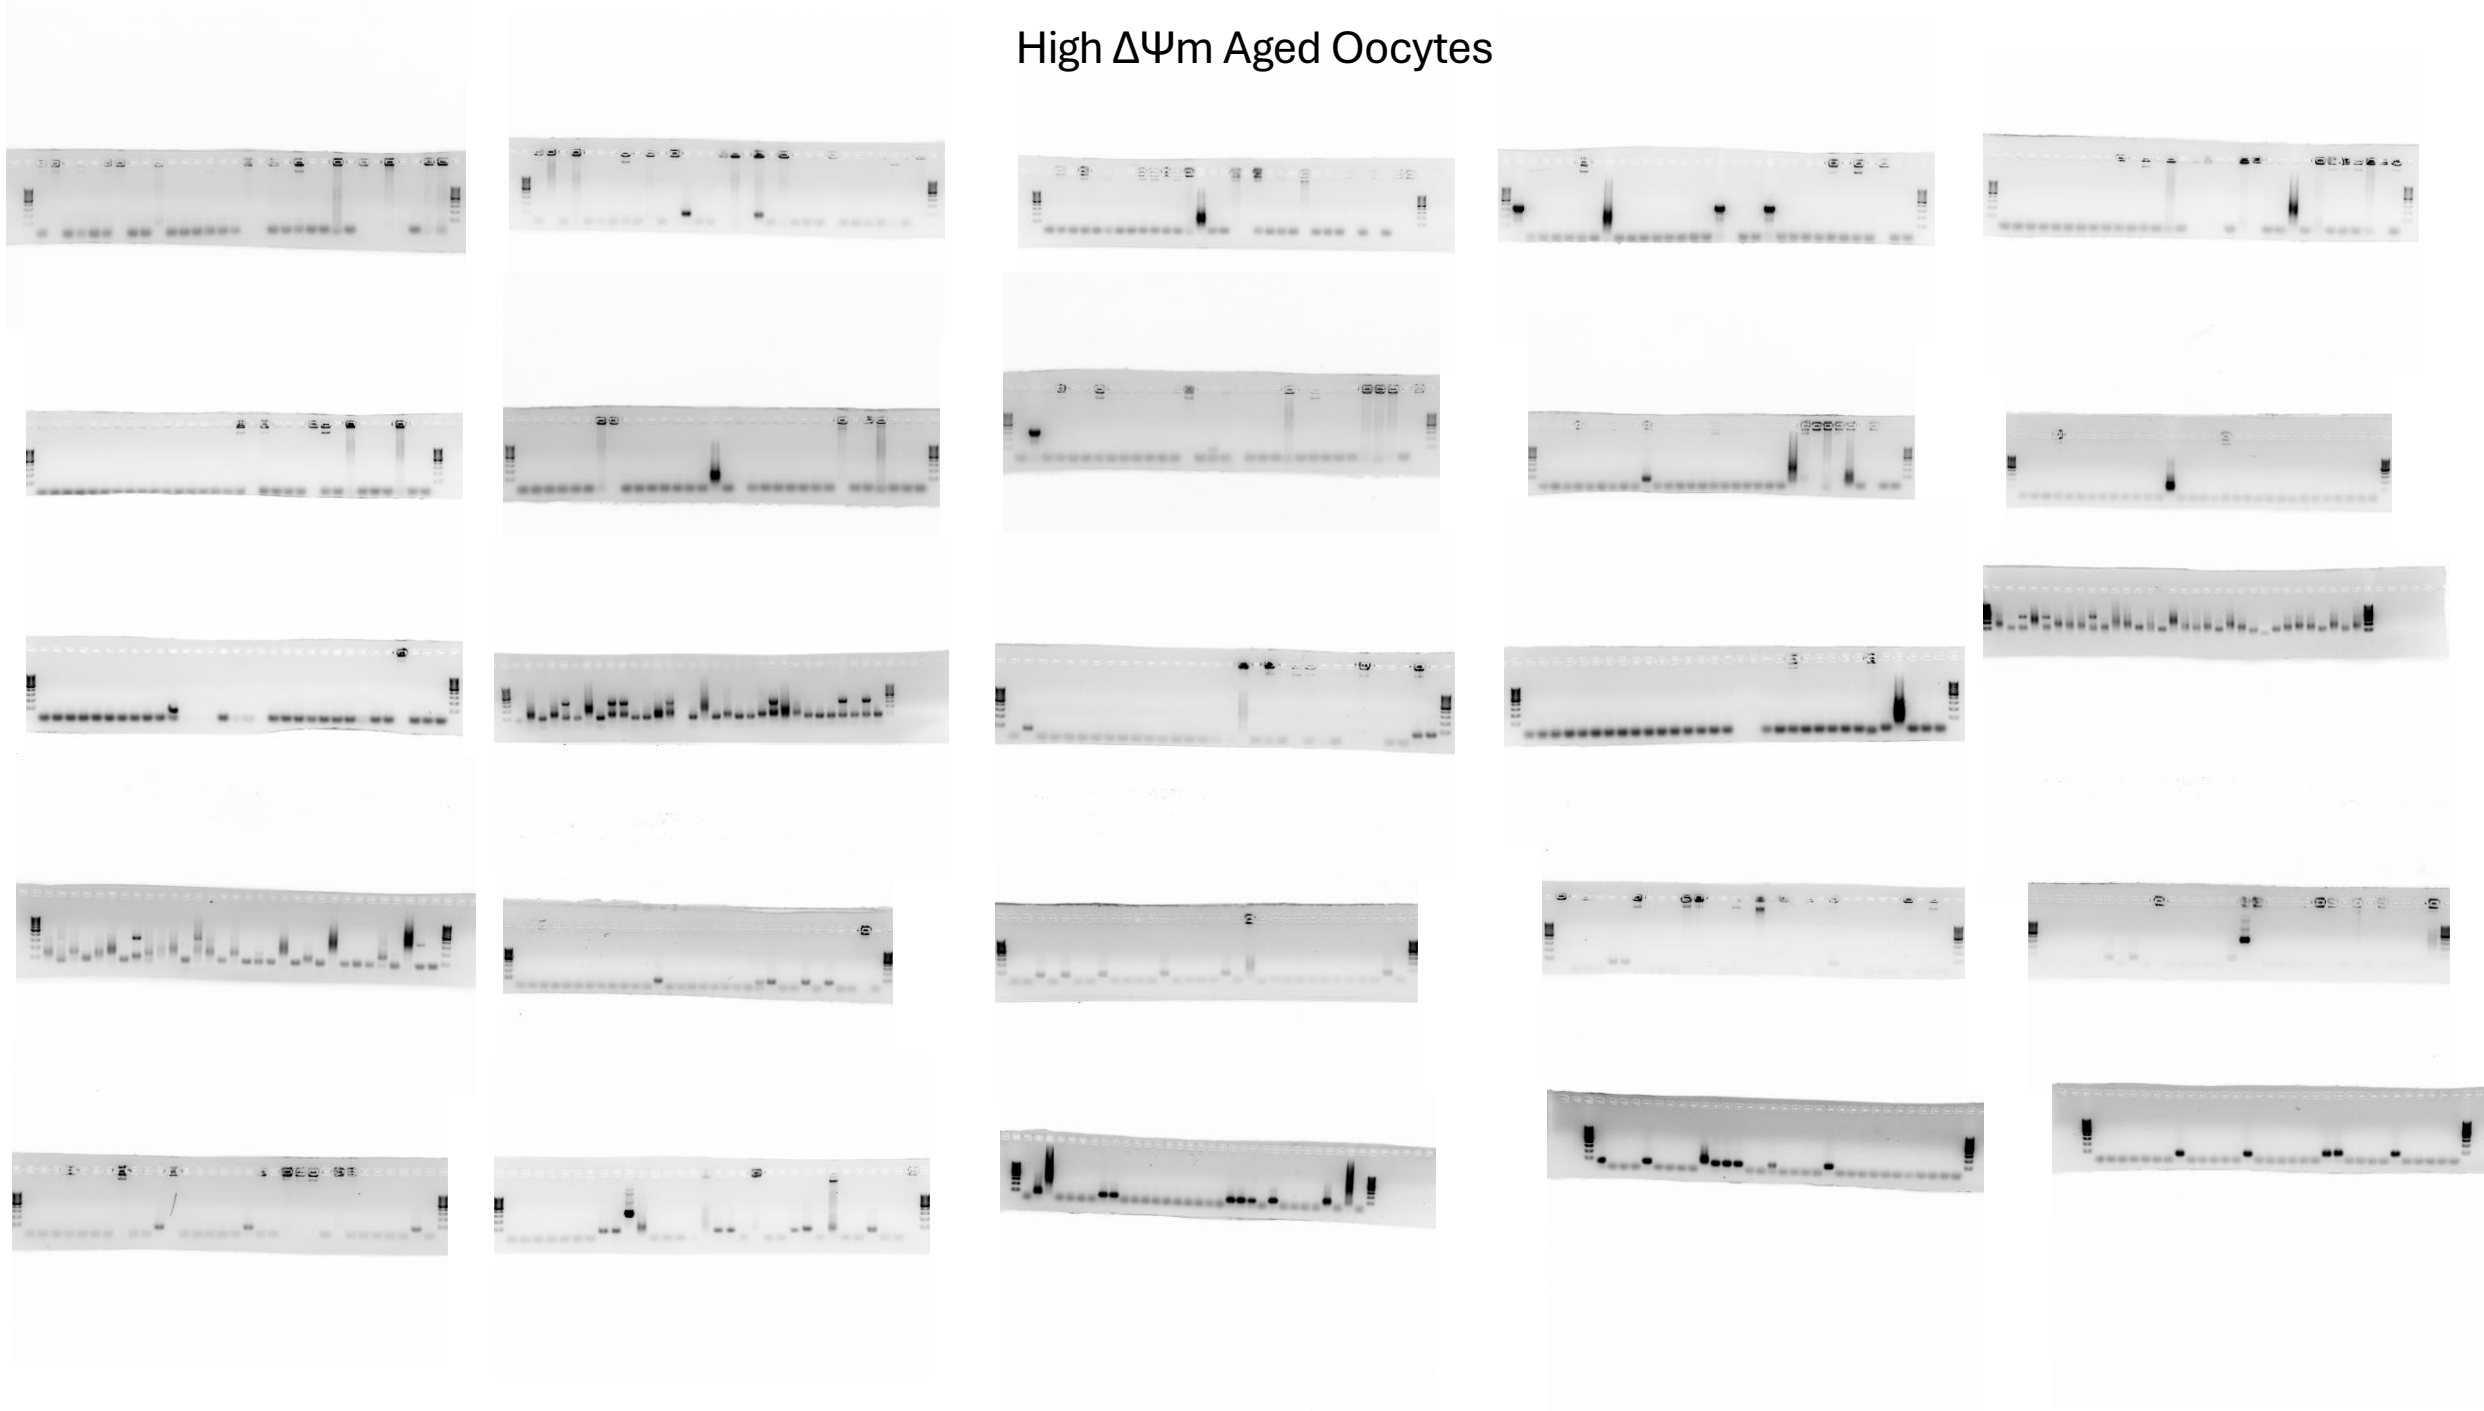

# High $\Delta\Psi_m$ Aged Oocytes

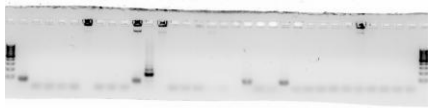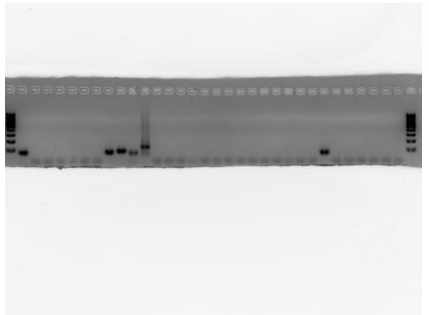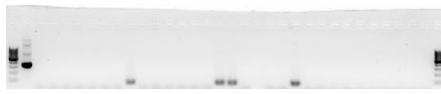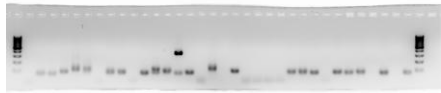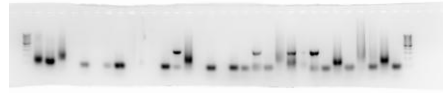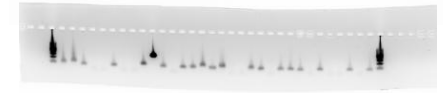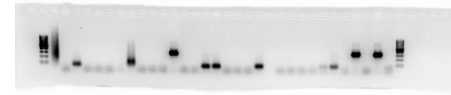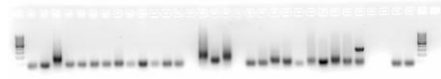

Supplement: Supplementary file 5 [file f0ff769647d5a90cc9b4acfa.pdf]
