# Supplementary material
Source: Research Square preprint supplement (doi:10.21203/rs.3.rs-9215979/v1)

# NMN Oocytes

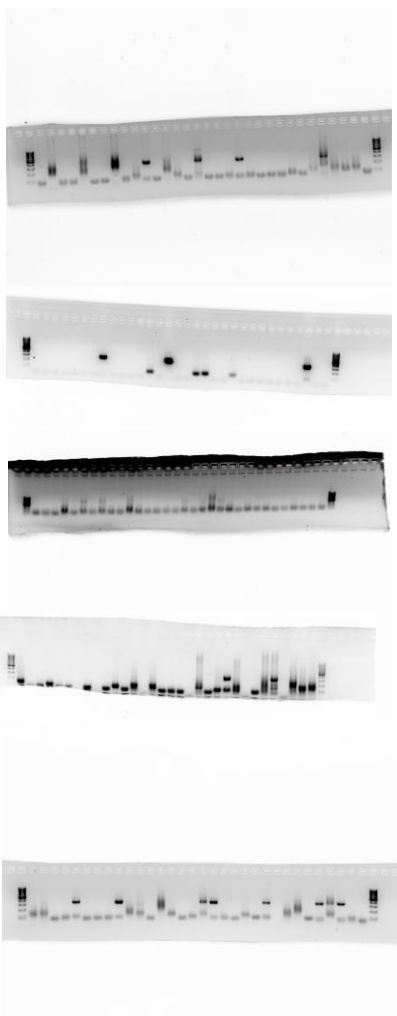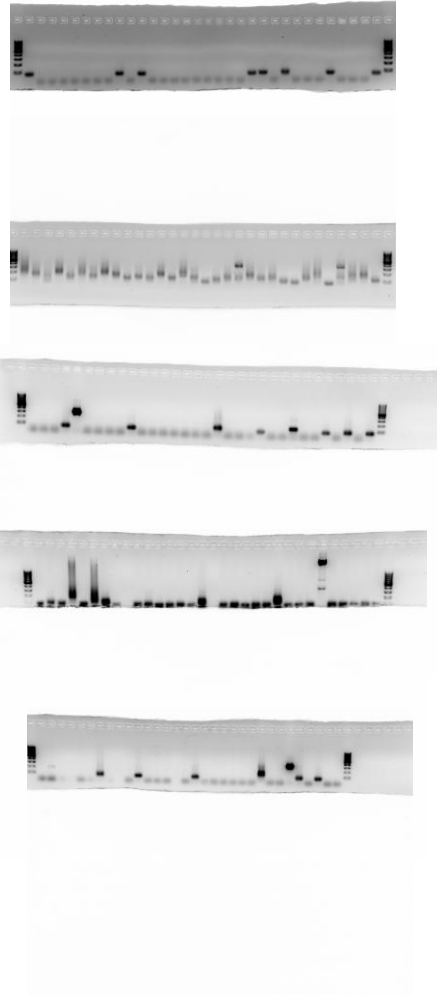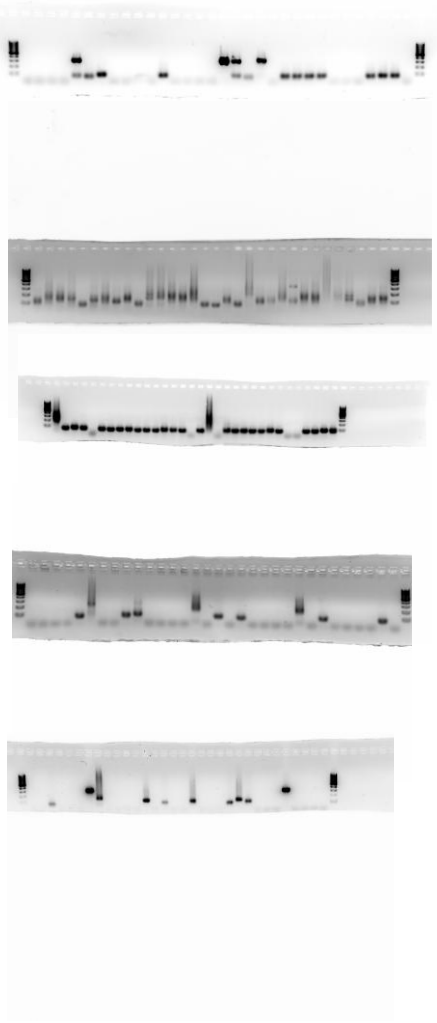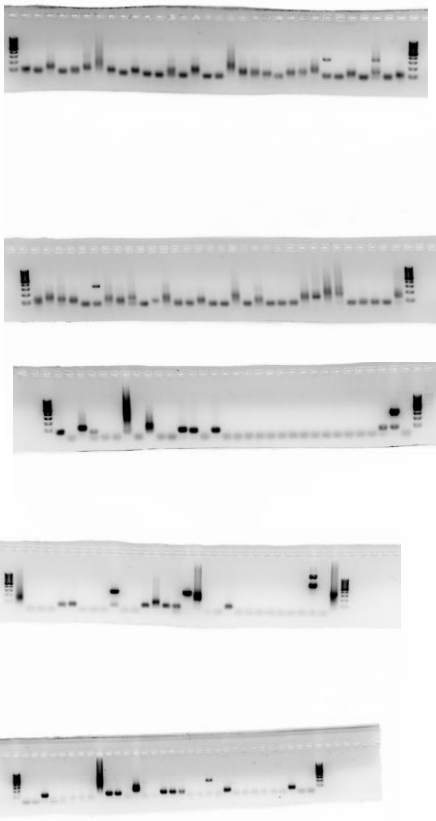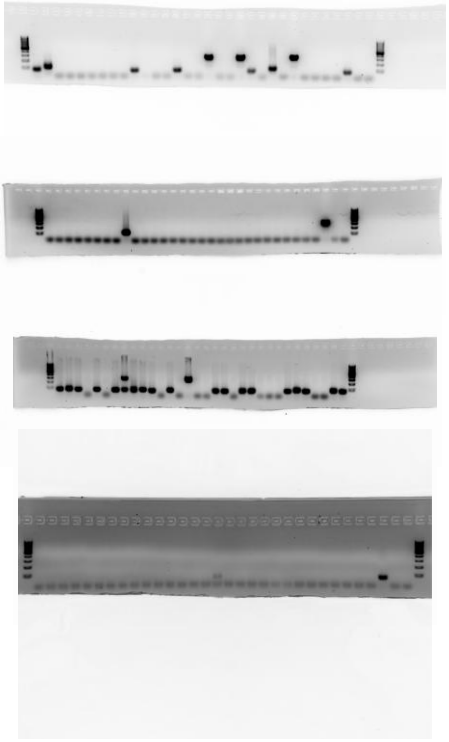

# NMN Oocytes

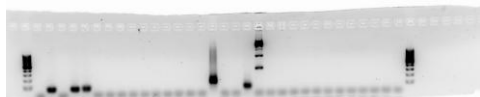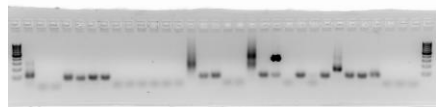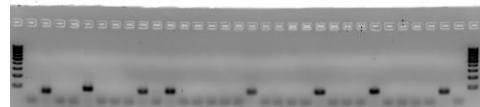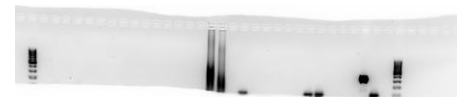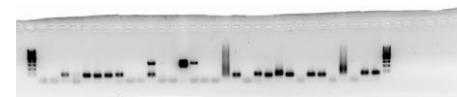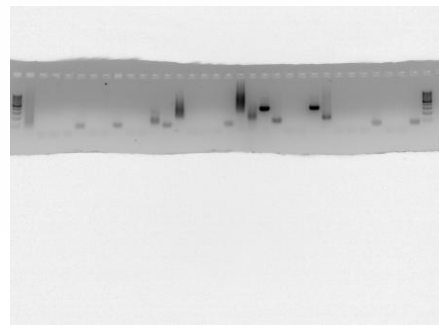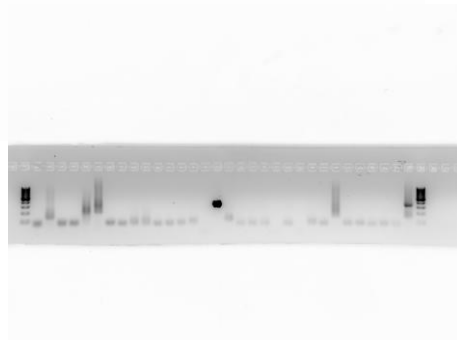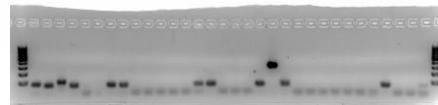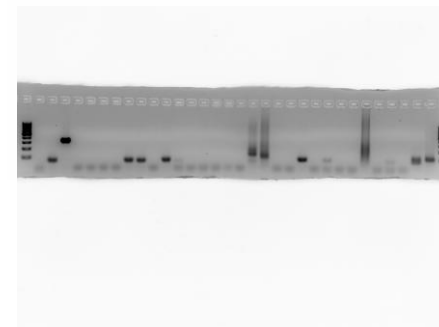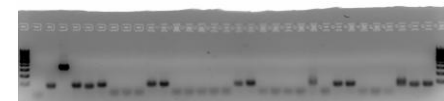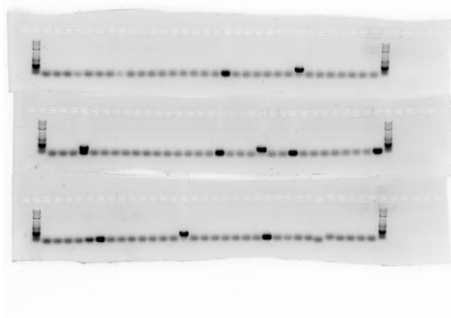

# Small NMN Oocytes

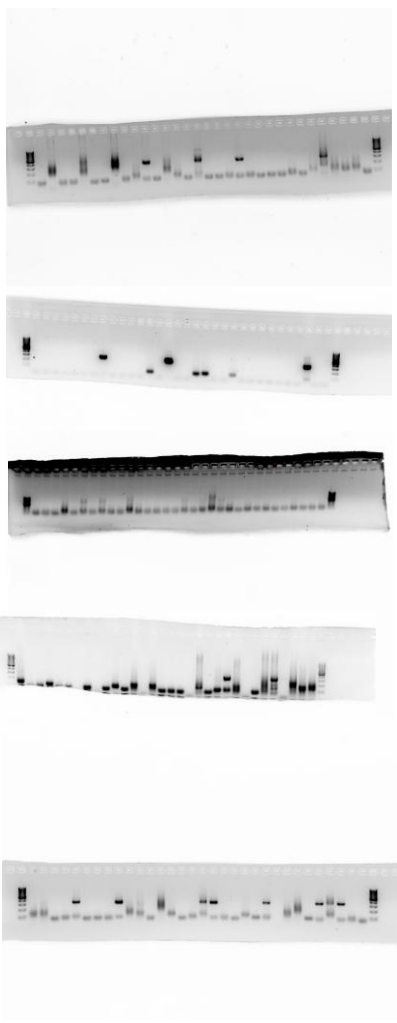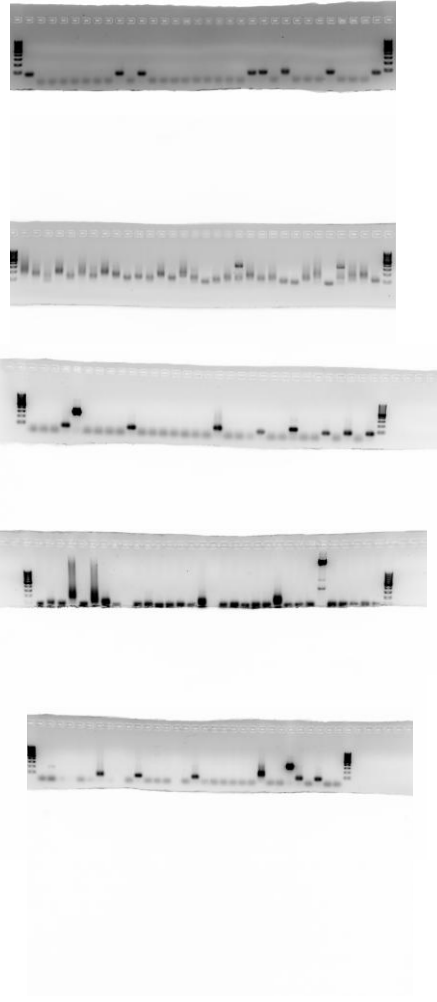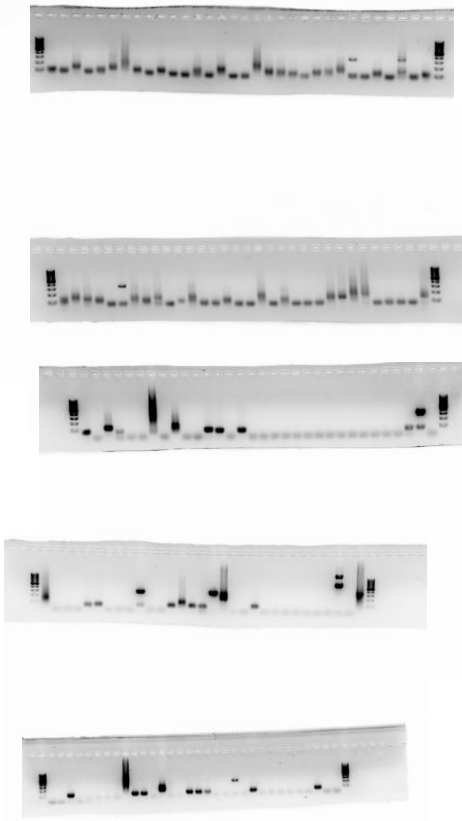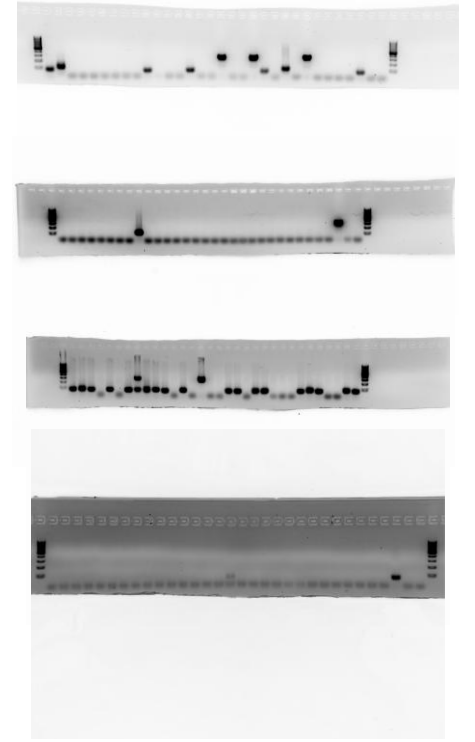





# High $\Delta\Psi_m$ NMN Oocytes

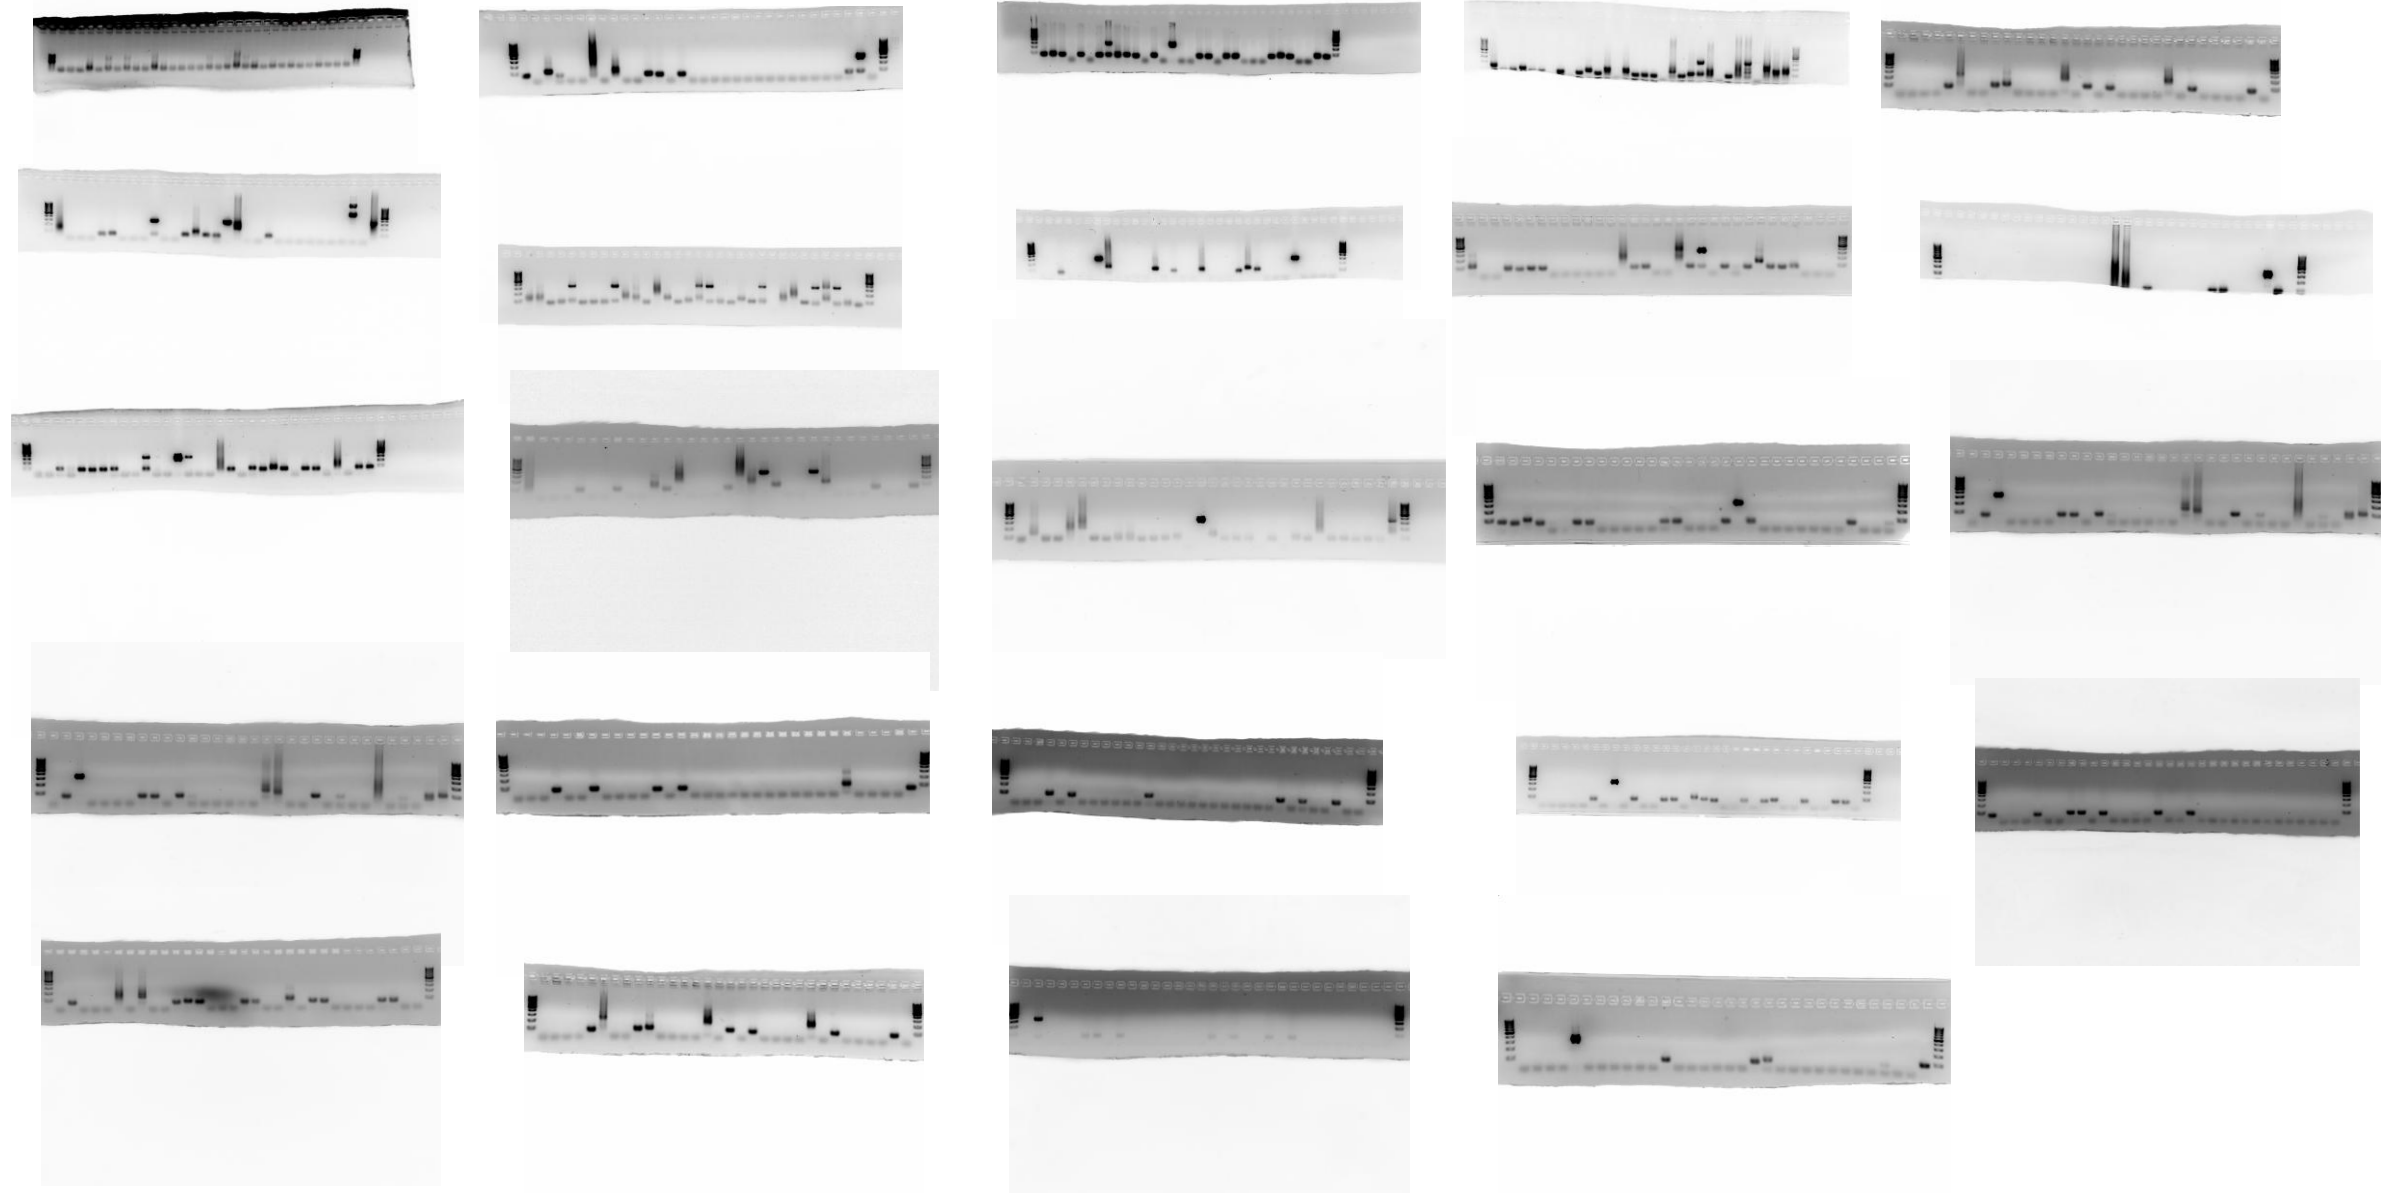

Supplement: Supplementary file 1 [file 1c2233a26af12e781e20e28a.pdf]

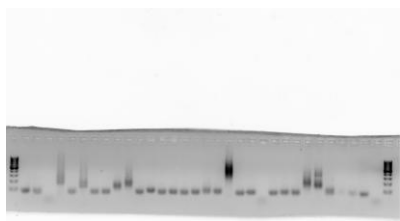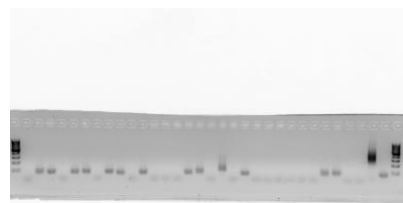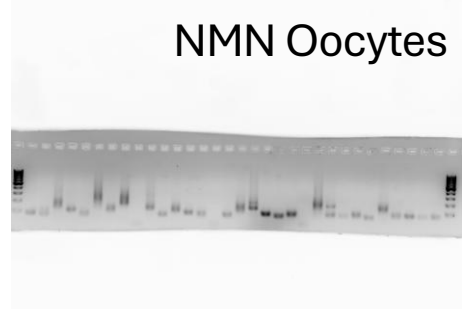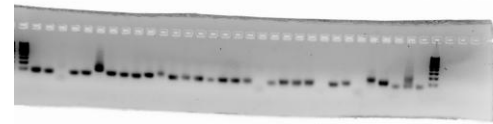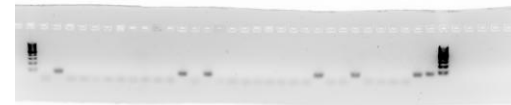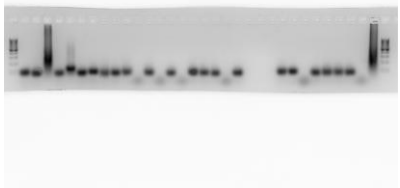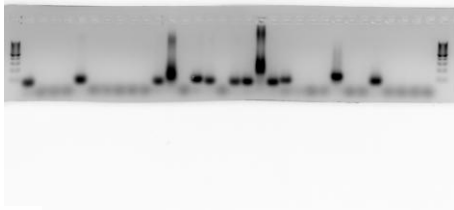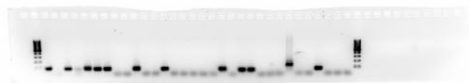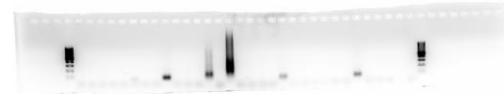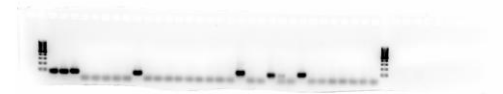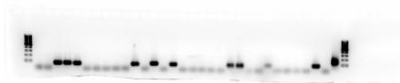



Large NMN Oocytes

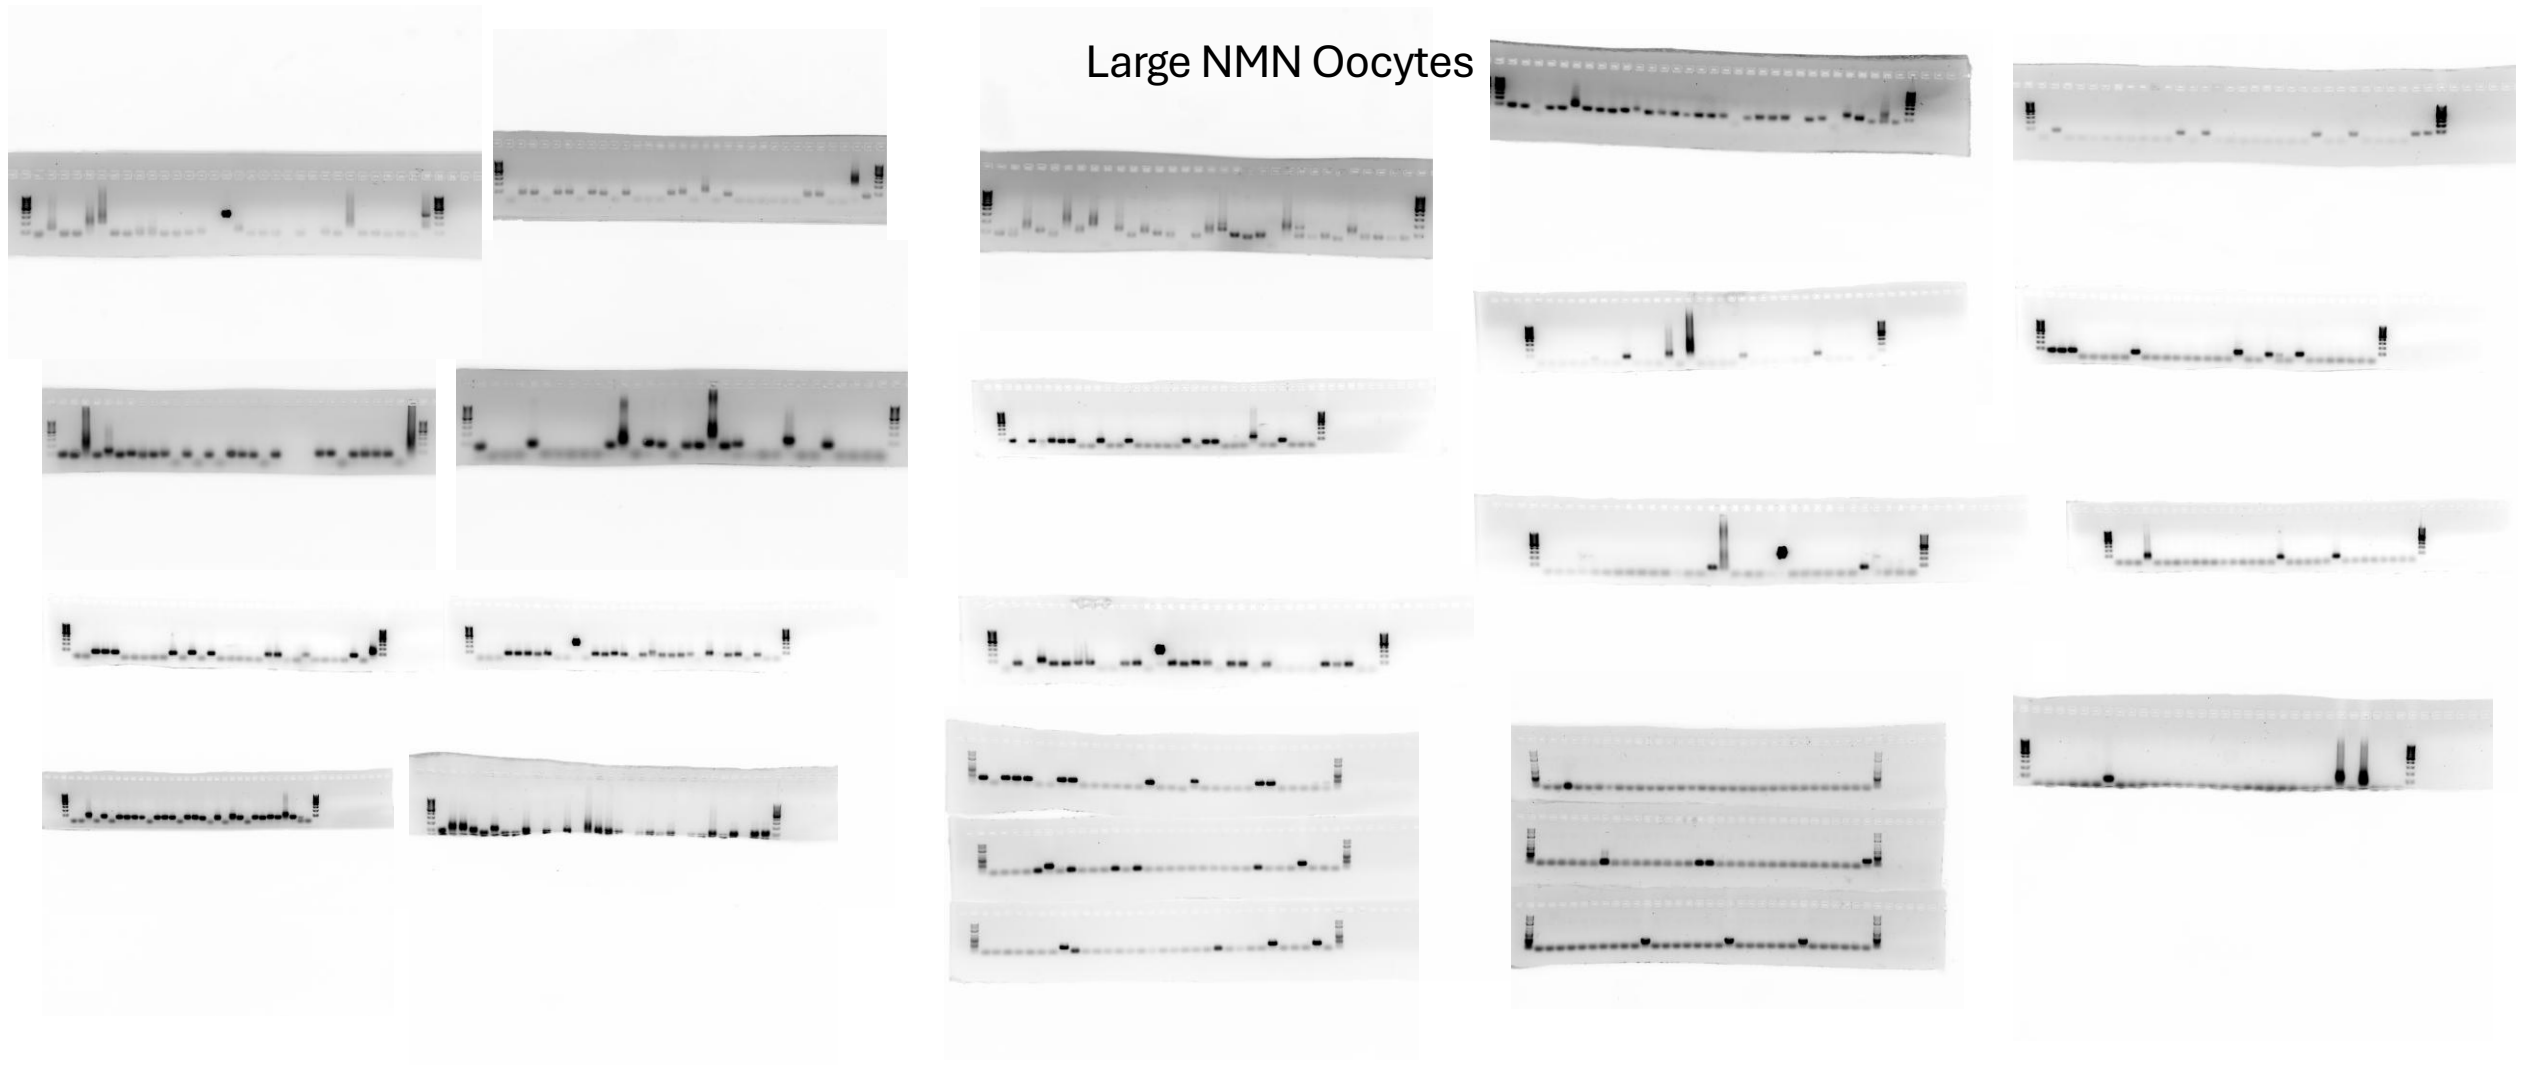

Supplement: Supplementary file 6 [file fa5b56ab149eef1bcca7d9c7.pdf]
